1 Short-chain fatty acid production by gut microbiota from children with obesity is linked to  
2 bacterial community composition and prebiotic choice

3

4 Zachary C. Holmes<sup>a</sup>, Justin D. Silverman<sup>b,c</sup>, Holly K. Dressman<sup>a,d</sup>, Zhengzheng Wei<sup>d</sup>,  
5 Eric P. Dallow<sup>a</sup>, Sarah C. Armstrong<sup>e</sup>, Patrick C. Seed<sup>f</sup>, John F. Rawls<sup>a,g,h</sup>, Lawrence A.  
6 David<sup>a,b,h\*</sup>

7

8 <sup>a</sup>Department of Molecular Genetics and Microbiology, Duke University School of  
9 Medicine, Durham, North Carolina

10 <sup>b</sup>Program in Computational Biology and Bioinformatics, Duke University, Durham, North  
11 Carolina

12 <sup>c</sup>Medical Scientist Training Program, Duke University School of Medicine, Durham,  
13 North Carolina

14 <sup>d</sup>Duke Microbiome Shared Resource, Center for Genomic and Computational Biology,  
15 Duke University, Durham, North Carolina

16 <sup>e</sup>Department of Pediatrics, Duke University School of Medicine, Durham, North Carolina

17 <sup>f</sup>Division of Pediatric Infectious Diseases, Ann & Robert H. Lurie Children's Hospital of  
18 Chicago, Chicago, Illinois

19 <sup>g</sup>Department of Medicine, Duke University School of Medicine, Durham, North Carolina

20 <sup>h</sup>Center for Genomic and Computational Biology, Duke University, Durham, North  
21 Carolina

22 \*Address correspondence to Lawrence A. David, [lawrence.david@duke.edu](mailto:lawrence.david@duke.edu)

23 **Abstract**

24 Pediatric obesity remains a public health burden and continues to increase in  
25 prevalence. The gut microbiota plays a causal role in obesity and is a promising  
26 therapeutic target. Specifically, the microbial production of short-chain fatty acids  
27 (SCFA) from the fermentation of otherwise indigestible dietary carbohydrates may  
28 protect against pediatric obesity and metabolic syndrome. Still, it has not been  
29 demonstrated that therapies involving microbiota-targeting carbohydrates, known as  
30 prebiotics, will enhance gut bacterial SCFA production in children and adolescents with  
31 obesity (age 10-18). Here, we used an *in vitro* system to examine the SCFA production  
32 by fecal microbiota from 17 children with obesity when exposed to five different  
33 commercially available over-the-counter (OTC) prebiotic supplements. We found  
34 microbiota from all 17 patients actively metabolized most prebiotics. Still, supplements  
35 varied in their acidogenic potential. Significant inter-donor variation also existed in SCFA  
36 production, which 16S rRNA sequencing supported as being associated with differences  
37 in the host microbiota composition. Last, we found that neither fecal SCFA  
38 concentration, microbiota SCFA production capacity, nor markers of obesity positively  
39 correlated with one another. Together, these *in vitro* findings suggest the hypothesis that  
40 OTC prebiotic supplements may be unequal in their ability to stimulate SCFA production  
41 in children and adolescents with obesity, and that the most acidogenic prebiotic may  
42 differ across individuals.

43

44

45 **IMPORTANCE** Pediatric obesity remains a major public health problem in the US, where  
46 17% of children and adolescents are obese, and rates of pediatric ‘severe obesity’ are  
47 increasing. Children and adolescents with obesity face higher health risks, and non-  
48 invasive therapies for pediatric obesity often have limited success. The human gut  
49 microbiome has been implicated in adult obesity, and microbiota-directed therapies can  
50 aid weight loss in adults with obesity. However, less is known about the microbiome in  
51 *pediatric* obesity, and microbiota-directed therapies are understudied in children and  
52 adolescents. Our research has two important findings: 1) dietary prebiotics (fiber) cause  
53 the microbiota from adolescents with obesity to produce more SCFA, and 2) the  
54 effectiveness of each prebiotic is donor-dependent. Together, these findings suggest  
55 that prebiotic supplements could help children and adolescents with obesity, but that  
56 these therapies may not be one-size-fits-all.

## 57 **Introduction**

58           Approximately 17% of children in the United States have obesity, and the  
59 prevalence continues to increase among all ages and populations (1). The prevalence of  
60 pediatric obesity is even higher in Hispanic and African American populations in the  
61 United States, where rates of severe obesity continue to increase (1). Children with  
62 obesity have an increased risk of adverse health events and incur higher healthcare costs  
63 (2-4). Despite the severity of the pediatric obesity epidemic, current common treatment  
64 strategies centered around lifestyle changes, including behavioral, dietary, and exercise  
65 interventions, often fail or have limited success (5). The high prevalence of pediatric  
66 obesity, coupled with the low success rate of common interventions, highlights the need  
67 for more efficacious, safe strategies to lower BMI in children and adolescents.

68           The human gut microbiome has emerged as a promising therapeutic target in  
69 pediatric obesity. Over the past decade, differences in gut microbial community  
70 composition and metabolic activity between obese and lean individuals have been  
71 observed (6-8). Causal links have also been established; fecal transplantation can  
72 transfer the obesity phenotype from obese donors to lean recipients and recapitulate  
73 some key metabolic changes in human obesity (9). Multiple mechanisms for this link have  
74 been proposed, including increased energy harvest by obese microbiota (10), activation  
75 of enteroendocrine signaling pathways by SCFA (11-13), modulation of glucose and  
76 energy homeostasis through bile acid signaling (14), and increased local and systemic  
77 inflammation caused by a variety of microbial metabolites (15).



78           Recent attention in obesity research has been specifically drawn to the role of  
79   microbially-derived short-chain fatty acids (SCFA). SCFAs, primarily acetate, propionate,  
80   and butyrate, are produced by enteric microbes as end products of anaerobic  
81   fermentation of undigested, microbially-accessible dietary carbohydrates, and serve a  
82   variety of important roles in the gut. Of particular interest is the SCFA butyrate, which  
83   serves as the primary nutrient source for colonocytes (16) and functions as a histone  
84   deacetylase inhibitor (17, 18). Through its inhibition of NF- $\kappa$ B signaling in colonocytes,  
85   butyrate contributes to barrier integrity maintenance and reduces levels of intestinal  
86   inflammation markers (19-22). Acetate, propionate, and butyrate also each activate G-  
87   protein coupled receptors (GPR) that modulate key metabolic hormones including peptide  
88   YY (PYY) and GLP-1 (12, 23). Consistent with these mechanistic findings, mouse studies  
89   have shown that supplementation with acetate, propionate, butyrate, or some mixture of  
90   these can protect against weight gain, improve insulin sensitivity, and reduce obesity-  
91   associated inflammation (24-29). Given the experimental evidence for SCFA  
92   supplementation having an anti-obesogenic effect in a murine system, maintaining high  
93   levels of SCFA during a weight loss treatment may improve results (27).

94           If increasing SCFA levels is a potential approach to promote weight loss in  
95   children, prebiotic supplementation may provide an effective and low-risk adjunctive  
96   therapy. Prebiotics are dietary carbohydrates that are indigestible by human-produced  
97   enzymes and thus survive transit to the lower GI tract. Once in the colon, prebiotics serve  
98   as carbon sources for bacterial fermentation, which in turn yield SCFAs as metabolic end  
99   products (30, 31). Multiple types of prebiotics (*e.g.* fructooligosaccharides (FOS), and

100 inulin-type fructans) have been tested in children with obesity ranging from ages 7-18. In  
101 select cases, these treatments have been associated with smaller increases in BMI and  
102 fat mass (32), and reductions in body weight z-scores, body fat, and trunk fat (33). Still,  
103 other prebiotic trials in overweight children have reported no significant beneficial effects  
104 (34).

105         Interpreting the mixed outcomes of prior prebiotic clinical trials in pediatric obesity  
106 though is complicated by several challenges. First, *in vivo* studies in pediatric obesity to  
107 date have each used only one prebiotic supplement due to the logistical constraints of  
108 clinical trials (32-34). Trials employing testing only a single type of supplement hinder the  
109 ability to generalize conclusions regarding the efficacy of prebiotics and also make it  
110 challenging to determine whether some prebiotics are inherently more acidogenic than  
111 others. Second, *in vivo* trials in healthy adults have shown substantial inter-individual  
112 variation in the single prebiotic effects on stool SCFA concentration (30, 31, 35). Variation  
113 in the primary and secondary outcomes could be due to differences in microbial SCFA  
114 production; or differences in host physiology, such as SCFA absorption potential. Third,  
115 while SCFA concentrations have been shown to be altered in children with overweight or  
116 obesity (36), changes in fecal SCFA during dietary intervention have not been measured  
117 in past *in vivo* studies in pediatric populations. If prebiotics mediate their effects through  
118 SCFA (33, 34, 37), directly tracking SCFAs could help determine treatment success.  
119 Fourth, *in vivo* studies in adults, especially those with obesity, may be confounded by the  
120 concurrence of chronic disease and the medications a person may be taking to treat  
121 chronic disease.

122           In this study, we have taken an *in vitro* approach to address the limitations of prior  
123 human studies. An *in vitro* approach facilitates more direct comparisons of different  
124 prebiotic supplements: the higher-throughput of *in vitro* experiments allows wider variety  
125 of prebiotics to be tested; and, the effects of these supplements can be tested on identical  
126 microbiota samples, rather than over time within subjects, which is confounded by  
127 microbiota drift over time (38), as well as inconsistencies in dietary composition. Taking  
128 an *in vitro* approach to studying the effects of prebiotics on gut microbiota allows a more  
129 direct investigation of microbial SCFA production, as we can study the effects of prebiotic  
130 supplementation independent of the effects of host absorption (39, 40). Using a preclinical  
131 *in vitro* fermentation model, and samples from adolescents with obesity who have not  
132 developed long-term complications, we pursued three specific lines of inquiry: 1) whether  
133 different types of prebiotics lead to differences in SCFA production by gut microbiota from  
134 adolescents with obesity; 2) whether the effects of prebiotics are shaped by inter-  
135 individual differences in gut microbiota structure; and, 3) whether fecal SCFA production  
136 is associated with protection from obesity.

## 137 **Results**

### 138 **SCFA production capacity**

139 To measure SCFA production by gut microbiota, we adapted the *in vitro* approach  
140 of Edwards et al. 1996 (41). This method was specifically designed to study fermentation  
141 of starch in the human lower GI tract, and has since been used to measure metabolite  
142 production from human stool samples when exposed to prebiotic fiber (42-44). In brief,  
143 we homogenized previously frozen feces in reduced phosphate buffered saline (pH 7.0  
144  $\pm$  0.1) to create a fecal slurry with a final concentration of 100g/L (Figure 1). These fecal  
145 slurries were then supplied with each of five prebiotic carbon sources, and a carbon-free  
146 control, and allowed to ferment at 37°C in anaerobic conditions for 24 hours, to  
147 approximate colonic transit time (45). Following the incubation period, the concentrations  
148 of SCFA in the samples were measured by gas chromatography. To control for  
149 differences in overall cell viability or stool slurry nutrient content between donors, we  
150 corrected measurements of SCFA concentration by dividing the treatment SCFA  
151 concentration by the control SCFA concentration.

152 To validate our assay, we ran a series of experiments using feces from validation  
153 sample sets. We verified that our control-corrected SCFA production data was not  
154 influenced by bacterial abundance ( $p = 0.38$ ,  $\rho = 0.14$ , Spearman correlation; Figure S1).  
155 Absolute (not relativized to control) SCFA concentrations are supplied in the supplement  
156 (Figures S2 and S3). As our fermentation experiments used previously frozen fecal  
157 samples, we verified that total SCFA production was strongly correlated between fresh  
158 samples and twice freeze-thawed samples ( $p < 0.0001$ ,  $\rho = 0.75$ , Spearman correlation;

159 Figure S4A). Since we elected to not provide our fermentation reactions with nutrients in  
160 excess of what was contained in the fecal slurries, we verified that there existed strong  
161 correlation in total SCFA production between PBS-grown and colonic medium-grown  
162 cultures (46), both when supplied with dextrin and inulin (Dextrin:  $p = 0.001$ ,  $\rho = 0.68$ ;  
163 inulin:  $p = 0.02$ ,  $\rho = 0.51$ ; Spearman correlations; Figure S5). We found that total SCFA  
164 production over control was positively correlated with the pH of starting fecal slurries ( $p =$   
165  $0.003$ ,  $\rho = 0.46$ ; Spearman correlation; Figure S6A). A weaker correlation may exist  
166 between SCFA production and the final pH of the fermentation vessels ( $p = 0.067$ ,  $\rho =$   
167  $0.29$ , Spearman correlation; Figure S6B).

168 We subsequently applied our assay to fecal microbiota from a cohort of 17 children  
169 ranging in age from 10 – 18, Tanner stages 2 – 5, and body-mass index (BMI) from 25.9  
170 – 75.3 (Table 1). We found all 17 individuals demonstrated a net gain of SCFA relative to  
171 the control in at least one prebiotic treatment, which led us to conclude that all tested  
172 cultures were viable and metabolically active (Figure 2).

173

#### 174 **Donor and prebiotic both impact SCFA production *in vitro***

175 We next tested the hypothesis that different prebiotics equally promote the  
176 production of SCFA by performing statistical analysis of SCFA production as a function  
177 of the prebiotic type and individual identity. Our analysis revealed heterogeneity in the  
178 efficacy of prebiotic supplements (two-way ANOVA,  $p < 0.001$ ; Table S1; Figure 2a),  
179 ranging from inulin, which resulted in a 2.35 mean fold change in total SCFA, to GOS,  
180 which resulted in 3.55 mean fold change in total SCFA. Frequently, only two or three of

181 the five tested prebiotics resulted in increased total SCFA production within an individual.  
182 Our statistical testing also revealed consistent patterns between individuals' gut  
183 microbiota in terms of SCFA production (two-way ANOVA,  $p < 0.001$ ; Table S1; Figure  
184 2b), with mean fold change in SCFA over control ranging from 2.37 to 6.12. Within  
185 individuals, the average fold change in SCFA concentration in the prebiotic treatments  
186 often appeared to be driven by a few strongly acidogenic prebiotics. Last, our analysis  
187 indicated a significant interaction between prebiotic type and individual identity (two-way  
188 ANOVA,  $p < 0.001$ ; Table S1; Figure 2c). Because our statistical analysis considered  
189 technical replicates as separate experimental conditions, this result suggests the  
190 presence of consistent prebiotic/individual responses across *in vitro* assay replicate runs  
191 – not whether such interactions are consistent within an individual over time.

192

### 193 **SCFA production *in vitro* predicts the abundance of bacteria in the starting culture**

194 If inter-individual differences in gut microbiota mediated responses to prebiotic  
195 treatment, we would expect that specific bacterial taxa, which varied between individuals,  
196 could also be associated with SCFA production. To evaluate this hypothesis, we used the  
197 R package *stray* (47) to create a Bayesian multinomial logistic normal linear regression  
198 (*pibble*) model that tested for correlations between *in vitro* SCFA production in response  
199 to each prebiotic and 16S rRNA community composition of patient stool used in the  
200 fermentations, at the genus level. This analysis revealed that SCFA production from  
201 prebiotics was correlated with the relative abundances of 18 different bacterial genera  
202 (95% credible interval not covering 0, Figure 3). Of the 13 genera positively associated

203 with SCFA production, 9 are known or likely fiber degraders (48-52), *Akkermansia*, is  
204 often observed to increase in abundance after prebiotic treatment (53), and one,  
205 *Methanobrevibacter*, an archaeon hydrogenotrophic methanogen, is known to increase  
206 the efficiency of carbohydrate metabolism by the microbiota (54) (Table 3). Most genera  
207 identified by *stray* were associated with SCFA production in a limited set of prebiotic  
208 treatments. One genus, *Lactobacillus*, is positively associated with SCFA production on  
209 XOS, but were negatively associated with SCFA production on GOS. Overall, the  
210 presence of specific associations between bacterial taxa and different prebiotics supports  
211 a model where different individuals vary in their levels of prebiotic degrading gut bacteria.

212

### 213 **Metrics of obesity do not appear to correlate with SCFA production capacity of** 214 **stool**

215 Finally, we tested the hypothesis that *in vitro* SCFA production would be  
216 associated with obesity-related phenotypes. We compared clinical metadata from  
217 individuals, which included BMI, insulin, and HbA1c, with average total SCFA production  
218 across prebiotics and found no significant correlations in our population (Spearman  
219 correlation; Table 2). Fecal microbial SCFA production capacity may not be directly  
220 associated with obesity though because rates of host SCFA uptake likely vary, and this  
221 variance may influence host intestinal physiology (55-57). Indeed, in support of the idea  
222 that SCFA absorption rate (which was not measured in this study) shape metabolic  
223 homeostasis and host health, we observed a negative association between fecal SCFA  
224 concentrations and *in vitro* SCFA production across the range of tested prebiotics (Figure

225 4). Furthermore, if SCFA absorption efficiencies varied by individual, residual fecal SCFA  
226 concentrations may not directly reflect the complete effect of bacterial metabolism on  
227 obesity. Consistent with this notion, no significant relationships were apparent between  
228 concentrations of SCFA in patient stool and clinical markers of obesity measured at  
229 enrollment, including BMI, insulin levels, and HbA1c (Table 2), although this may also be  
230 explained by uncontrolled patient parameters.



## 231 **Discussion**

232           In this study we found that the microbiota of all tested adolescents with obesity  
233 increased total SCFA production when exposed *in vitro* to at least one prebiotic. Both  
234 donor and prebiotic were significant factors in determining SCFA production *in vitro*, as  
235 was their interaction. Our modeling revealed distinct associations between specific  
236 microbial taxa and SCFA production on different prebiotics. We interpret this result as  
237 suggesting that the associated bacteria play a role in the fiber fermenting capacity of the  
238 community. We observed no correlations between either stool SCFA concentrations or *in*  
239 *vitro* acidogenic capacity of communities and any metrics of obesity (Table 2).

240           We have recapitulated previous findings that both donor and prebiotic are  
241 important in determining the SCFA production from *in vitro* prebiotic supplementation (31,  
242 50, 58), and we found that not all prebiotics appear equally acidogenic (50). Since our *in*  
243 *vitro* system removes the host as a potential source of variation, our data support a gut  
244 microbial role for inter-donor variation in fecal SCFA production. In addition, the strength  
245 of the interaction between donor and prebiotic strongly suggests that prebiotics are not  
246 one-size-fits-all; rather, inconsistent results from prior studies of prebiotics in pediatric  
247 obesity (32, 34, 59) may be due to variation in the SCFA production capacity of  
248 individuals' gut microbiota across the tested prebiotics. Future therapeutic efforts  
249 involving prebiotics in patients with obesity may benefit from stratified or personalized  
250 treatments. Nutritional therapies that are personalized to individuals' microbiota are  
251 already in development (60).

252 Murine and *in vitro* studies show that increased signaling through GPRs, mediated  
253 by acetate, propionate, and butyrate, increases satiety and insulin sensitivity, while  
254 decreasing adipogenesis (12, 23, 61), yet, we did not observe associations between fecal  
255 SCFA levels and metrics of obesity. The effects of SCFA on obesity may be masked by  
256 uncontrolled patient factors, such as differences in caloric intake and variation in  
257 individual nutrient harvest and utilization. In order to observe the effects of SCFA on  
258 obesity, it would be necessary to control for these variable physiological and lifestyle  
259 parameters, which we did not attempt. These patient factors may also have influenced  
260 our inability to observe an association between acidogenic capacity of microbiota and  
261 fecal SCFA concentrations. However, this may also be explained by the potential  
262 uncoupling of fecal SCFA production and fecal SCFA concentration. *In vitro*, increased  
263 luminal concentrations of butyrate have been shown to upregulate the sodium-coupled  
264 monocarboxylate transporter SLC5A8 (55), and addition of physiological mixtures of  
265 SCFA has been shown to upregulate the monocarboxylate transporter SLC16A1 (62),  
266 both of which uptake acetate, propionate, and butyrate from the lumen. Since gut epithelia  
267 have the capacity to absorb up to 95% of SCFA before excretion (63), increased host  
268 SCFA uptake (triggered by increased gut bacterial production) could, therefore, lead to  
269 constant or even decreased fecal SCFA concentrations. This complex relationship could  
270 explain the absence of positive correlations we observed between stool SCFA levels and  
271 the acidogenic capacity of gut microbiota. It may be necessary to delve further upstream  
272 of fecal SCFA concentration by measuring proxies for host SCFA uptakes, such as the

273 expression of SCFA transporters (SLC5A8 and SLC16A1) and SCFA receptors (GPR43,  
274 GPR41, and GPR109A) (55).

275         The primary limitations of this study involve constraints common to *in vitro* culture  
276 studies. First, many factors affecting bacterial SCFA production *in vivo* are difficult to  
277 replicate *in vitro*, including the availability of nutrients such as nitrogen, the starting  
278 concentration of SCFA, the redox state of the environment, and the efficiency of cross-  
279 feeding interactions (64, 65). Different metabolic results between prebiotics may have  
280 occurred if we provided alternative co-metabolites or nutrients, in addition to the tested  
281 prebiotics. We chose our culture conditions, namely a media-free approach that does not  
282 add any nutrients beyond what is present in the stool, in an effort to avoid inducing artificial  
283 selective conditions within our cultures. Prior experimental digestion studies have shown  
284 that prebiotic response patterns can be recapitulated across varying culture conditions  
285 (42, 44). Indeed, we found strong correlation in SCFA production between cultures grown  
286 with our media-free approach and those grown in a more conventional medium containing  
287 added nitrogen, vitamins, minerals, and acetate. Further, this approach allowed us to  
288 minimize the influence of the host on measurements of microbiota production of SCFA.  
289 We did observe shifts in community composition during the 24 hour fermentations (Figure  
290 S7); however, we remained able to find statistical associations between SCFA production  
291 capacity and pre-fermentation community composition. A second set of limitations in this  
292 study involves our reliance on patient collection of stool. Inter-donor variation in prebiotic  
293 response could have originated in technical variation between how patients exposed stool  
294 to aerobic conditions (66) or how they froze their samples (67), which in turn could have

295 affected the fraction of viable microbial cells in stool samples. Still, we found a significant  
296 correlation between *in vitro* total SCFA production from fresh stool and stool that had  
297 been frozen and thawed twice. Variation in donor prebiotic response could also have  
298 biological origins due to physiological differences between people (*e.g.* efficiency of food  
299 digestion, consistency of stool (68)) or differences in diet, which can lead to variation in  
300 stool microbial load and nutrient content (69). Rather than control for a myriad of different  
301 sources of variation whose origins we did not measure, we chose the straightforward  
302 approach of standardizing donor samples by employing a consistent concentration of  
303 stool slurry (5% w/v stool in PBS) in our experiments.

304 Future work to address these limitations could test multiple stool samples per  
305 subject to confirm whether the observed variation in prebiotic response is durable  
306 between individuals over time. Future studies could also examine the correlation between  
307 the metabolic effects of prebiotic supplementation *in vitro* and *in vivo* using randomized  
308 human trials that couple human prebiotic supplementation, *in vivo* measurement of SCFA  
309 production, and *in vitro* tests of microbiota metabolic activity. It would also be useful for  
310 such studies to explore the impact of prebiotic supplementation on host physiology, both  
311 *in vitro* and *in vivo*. Specifically, the effects of prebiotic supplementation on colonic  
312 epithelial barrier integrity, SCFA receptor (GPR41, 43, 109A) expression, and SCFA  
313 transporter (MCT1, SMCT1) expression could provide greater insight into the health  
314 impacts of prebiotic supplementation, as well as explain why fecal SCFA concentrations  
315 may not mirror the metabolic capacity of gut microbiota.

## 316 **Methods**

### 317 **Cohort**

318 Stool was collected from human donors under a protocol approved by the Duke  
319 Health Institutional Review Board (Duke Health IRB Pro00074547) for a prospective  
320 longitudinal cohort study and biorepository. Participants whose samples were used in  
321 this study were treatment-seeking adolescents with obesity who were newly enrolled in  
322 a multi-disciplinary weight management program. All subjects received family-based  
323 intensive lifestyle modification. Based on clinical necessity, some participants also were  
324 placed on a low-carbohydrate diet, medications to facilitate weight loss, or underwent  
325 weight loss surgery (Table S2). Due to the low number of patients assigned to each  
326 treatment arm, we did not attempt to base any analyses on patient treatment plan.  
327 Patients were aged 10-18, with BMI  $\geq$  95<sup>th</sup> percentile. None had prior antibiotic use in  
328 the 1 month prior to enrolment, used medications known to interfere with the intestinal  
329 microbiome, and did not have other significant medical problems. Stool samples used in  
330 this study were from enrollment, 3-month, 4.5-month, and 6-month follow-up visits  
331 (Table S2). The clinical metadata used for correlations was collected at enrollment, 3  
332 months, and 6 months. The metadata collected nearest to the stool sample collection  
333 date was used in our analyses.

334

### 335 **Stool Collection**

336 Patients collected intact stool samples in the clinic or at home using a plastic stool  
337 collection container (Fisher Scientific: 02-544-208) and were asked to immediately store

338 this container in their home freezer. Patients then returned the sample by either bringing  
339 it to the study team or scheduling a home pickup within 18 hours of stooling. Stool was  
340 transported frozen in an insulated container with an ice pack. Upon receipt in the lab,  
341 samples were placed on dry ice until transferred to a -80°C freezer for long term storage.  
342 All patient samples were frozen at -80°C within 19 hours of stooling (range, 0.08hr –  
343 18.83hr; median, 11.42hr) except one which was stored 44.03hr after stooling. The time  
344 between stooling and freezing at -80°C did not have a significant effect on average SCFA  
345 production ( $p = 0.58$ ,  $\rho = -0.15$ , Pearson correlation). Stool samples for analysis were  
346 processed by removing containers from -80°C storage and thawing on ice in a biological  
347 safety cabinet until soft enough to aliquot. Thawed containers of stool were opened to  
348 atmosphere for a maximum of 10 minutes while samples were aliquoted. After primary  
349 aliquoting, the remaining stool was transferred to an anaerobic chamber (COY Laboratory  
350 Products, 5% hydrogen, 5% CO<sub>2</sub>, 90% Nitrogen) and further portioned into approximately  
351 2g aliquots for this study. These aliquots were then stored as solid stool pellets at -80°C  
352 until used for this study.

353

#### 354 ***In vitro* fermentation**

355 See figure 1 for an overview of *in vitro* fermentation methods. Aliquoted stool was  
356 thawed at room temperature in an anaerobic chamber. Once thawed, stool was weighed  
357 and placed into a polyethylene filter bag with 0.33mm pore size (Whirl-Pak B01385) and  
358 10mL of anaerobic 1X PBS was added for each gram of stool, resulting in a 10% w/v fecal  
359 slurry, similar to previous studies (41, 42, 70, 71). During our validation experiments, a

360 medium designed to simulate colonic contents was used in place of 1X PBS to create  
361 stool slurries (46). The filter bag was then closed and placed into a stomacher (Seward  
362 Stomacher 80) where the contents were homogenized on the medium speed setting for  
363 60 seconds. The liquid fraction was removed from the downstream side of the filter  
364 membrane, and the solid fraction was discarded. A 1mL aliquot of this liquid fraction was  
365 removed for analysis of SCFA concentration, to determine the SCFA concentration of the  
366 starting stool sample. During our validation experiments, two separate 1mL aliquots of  
367 this liquid fraction were removed: one was used to estimate relative bacteria abundance  
368 of starting fecal slurries using total DNA, as has been previously published (72); the  
369 remaining aliquot was used to determine the pH of the starting fecal slurry using a  
370 handheld pH meter (Elite pH Spear, Thermo-Fischer Scientific). The remaining liquid  
371 fraction was incubated in duplicate across six different treatments, either supplemented  
372 with inulin (Now Foods Inulin Powder, part #2944), fructooligosaccharides (FOS; Cargill,  
373 part #100047199), galactooligosaccharides (GOS; Bimuno Powder),  
374 xylooligosaccharides (XOS; BioNutrition prebiotic with Llife-Oligo, part #359), wheat  
375 dextrin (Benefiber Original), or unsupplemented. For each reaction, 1mL of 10% fecal  
376 slurry was placed in one well of a 24-well cell culture plate. Each well was then delivered  
377 1mL of 1% (w/v) prebiotic solution in 1X PBS; or 1mL of 1X PBS without prebiotic. During  
378 our validation experiments, prebiotics were dissolved in colonic medium instead of 1X  
379 PBS. The resulting fermentation conditions were therefore 5% fecal slurry with 0.5%  
380 prebiotic (w/v). A 5% fecal slurry was selected because its fermentative capacity has been  
381 previously demonstrated to be insensitive to small variations in concentration and is

382 feasible to work with using this method (42). A 0.5% final concentration of prebiotic in the  
383 context of a 5% fecal slurry is analogous to an average adult consuming 20g of dietary  
384 fiber per day, assuming an average daily stool mass of 200g (73). Fermentation reactions  
385 were carried out in an anaerobic chamber at 37°C for 24 hours. Following fermentation,  
386 1mL media was taken from each reaction vessel for SCFA quantification. During our  
387 validation experiments, a separate 1mL aliquot was taken for pH measurement.

388

### 389 **Simulation of Freeze/Thaws Experienced by Study Samples**

390 To test the effects of freeze/thaw cycles on *in vitro* SCFA production, we collected  
391 fresh, whole fecal samples from four healthy adults who were not patients in the study  
392 cohort. Informed consent was obtained from volunteers and the protocol was approved  
393 by the Duke Health Institutional Review Board. Samples were brought into an anaerobic  
394 chamber after voiding. Once in anaerobic conditions, these samples were divided into  
395 three aliquots. One aliquot was processed immediately following the same *in vitro*  
396 fermentation protocol used in our study. transferred to -80C storage. After a minimum of  
397 24 hours, one of these two aliquots was removed from the freezer and thawed at room  
398 temperature for 2 hours, before being returned to -80C for an additional minimum of 24  
399 hours. Each of these frozen aliquots was thawed and processed following the same *in*  
400 *vitro* fermentation protocol. This allowed direct comparison of samples that had been used  
401 in fermentations immediately after voiding to those that had been frozen and thawed one  
402 and two times.

403



## 404 **Media Preparation**

405 To validate our methods, namely our use of a 5% fecal slurry in PBS, without  
406 supplementation of other nutrient components, we compared SCFA production with our  
407 methods to SCFA production when stool was instead resuspended in a medium  
408 designed to simulate the large intestine. We used a slightly modified medium derived  
409 from Gamage et al. 2017 (46). The media contained, per liter: peptone 0.5g, yeast  
410 extract 0.5g, NaHCO<sub>3</sub> 6g, hemin solution (0.5% (w/v) hemin and 0.2% (w/v) NaOH)  
411 100uL, L-cysteine HCl monohydrate 0.53g, bile salts 0.5g, Vitamin Supplement (ATCC  
412 MD-VS) 1mL, K<sub>2</sub>HPO<sub>4</sub> 0.228g, KH<sub>2</sub>PO<sub>4</sub> 0.228g, (NH<sub>4</sub>)<sub>2</sub>SO<sub>4</sub> 0.228g, NaCl 0.456g,  
413 MgSO<sub>4</sub> 0.0456g, CaCl<sub>2</sub> 0.0460g, Trace Mineral Supplement (ATCC MD-TMS) 1mL,  
414 and 287uL glacial acetic acid. The pH of the medium was adjusted to 7.0±0.1.

415

## 416 **Quantification of SCFA**

417 The SCFA concentration of fecal slurries and fermentation vessels was determined  
418 following a protocol adapted from Zhao, Nyman, and Jönsson (74). First, a 1mL aliquot  
419 of either 10% fecal slurry in PBS or the fermentation vessel contents was obtained. To  
420 this, 50 µL of 6N HCl was added to acidify the solution to a pH below 3. The mixture was  
421 vortexed, centrifuged at 14,000rcf for 5 minutes at 4°C to remove particles. Avoiding the  
422 pellet, 750 µL of this supernatant was passed through a 0.22µm spin column filter. The  
423 resulting filtrate was then transferred to a glass autosampler vial (VWR part #66009-882).

424 Filtrates were analyzed on an Agilent 7890b gas chromatograph (GC) equipped  
425 with a flame-ionization detector (FID) and an Agilent HP-FFAP free fatty-acid column

426 (25m x .2mm id x .3 $\mu$ m film). A volume of 0.5 $\mu$ L of the filtrate was injected into a sampling  
427 port heated to 220°C and equipped with a split injection liner. The column temperature  
428 was maintained at 120°C for 1 minute, then ramped to 170°C at a rate of 10°C/min, then  
429 maintained at 170°C for 1 minute. The helium carrier gas was run at a constant flow rate  
430 of 1mL/min, giving an average velocity of 35 cm/sec. After each sample, we ran a one  
431 minute post-run at 220°C and a carrier gas flow rate of 1mL/min to clear any residual  
432 sample. All C2:C5 short-chain fatty acids were identified and quantified in each sample  
433 by comparing to an 8-point standard curve that encompassed the sample concentration  
434 range. Standards contained 0.1mM, 0.2mM, 0.5mM, 1mM, 2mM, 4mM, 8mM, and 16mM  
435 concentrations of each SCFA.

436

### 437 **DNA Extraction, PCR Amplification, and Sequencing**

438 We performed 16S rRNA gene amplicon sequencing on human stool samples to  
439 determine microbiota community composition. DNA was extracted from frozen fecal  
440 samples with the Qiagen DNeasy PowerSoil DNA extraction kit (ID 12888-100). Amplicon  
441 sequencing was performed using custom barcoded primers targeting the V4 region of the  
442 16S gene (75), using published protocols (75-77). The sequencing library was diluted to  
443 a 10nM concentration and sequenced using an Illumina MiniSeq and a MiniSeq Mid  
444 Output Kit (FC420-1004) with paired-end 150bp reads.

445

### 446 **Identifying Sequence Variants and Taxonomy Assignment**

447 We used an analysis pipeline with DADA2 (78) to identify and quantify sequence  
448 variants, as previously published by Silverman et al. (79). To prepare data for denoising  
449 with DADA2, 16S rRNA primer sequences were trimmed from paired sequencing reads  
450 using Trimmomatic v0.36 without quality filtering (80). Barcodes corresponding to reads  
451 that were dropped during trimming were removed using a custom python script. Reads  
452 were demultiplexed without quality filtering using python scripts provided with Qiime v1.9  
453 (81). Bases between positions 10 and 150 were retained for the forward reads and  
454 between positions 0 and 140 were retained for the reverse reads. This trimming, as well  
455 as minimal quality filtering of the demultiplexed reads was performed using the function  
456 `fastqPairedFilter` provided with the DADA2 R package (v1.8.0). Sequence variants were  
457 inferred by DADA2 independently for the forward and reverse reads of each of the two  
458 sequencing runs using error profiles learned from all 20 samples. Forward and reverse  
459 reads were merged. Bimeras were removed using the function `removeBimeraDenovo`  
460 with default settings. Taxonomy was assigned using the function `assignTaxonomy` from  
461 DADA2, trained using version 123 of the Silva database.

462

### 463 **Modeling Microbial Composition Data**

464 To associate microbial genera to SCFA production on different prebiotics, the  
465 sequence variant table was amalgamated to the genus level using the R package  
466 *phyloseq* (81). Genera that were observed with at least 3 counts in at least 3 samples  
467 were retained. This filtering step retained 99.3% of sequence variant counts and a total  
468 of 97 genera.

469 To associate microbial composition to SCFA production on different prebiotics we  
470 made use of Bayesian Multinomial Logistic-Normal linear regression implemented in the  
471 R package *stray* as the function *pibble* (82). We chose this method to account for  
472 uncertainty due to counting, and compositional constraints as motivated in Silverman,  
473 Durand (79) and Grantham, Reich (83). Our regression model was defined for the  $j$ -th  
474 sample by the covariate vector  $x_j = [1, x_{j(Inulin)}, x_{j(GOS)}, x_{j(XOS)}, x_{j(Dextrin)}]^T$  where  
475  $x_{j(Inulin)}$  is the amount of total SCFA produced by the community in sample  $j$  as assessed  
476 by our *in vitro* assay and the preceding 1 represents a constant intercept. The regression  
477 model priors required that 4 hyperparameters *Gamma*, *Theta*, *Xi*, and *upsilon* be  
478 specified. We set the hyperparameters *Theta* to an  $D \times Q$  matrix of zeros (where  $D = 97$ ,  
479 the number of sequence variants; and  $Q = 5$ , the number of covariates) representing our  
480 prior assumption that, on average, the association between each prebiotic and each taxon  
481 is zero.

482 We set the hyperparameters *Gamma* to be the matrix

$$483 \begin{bmatrix} 5 & 0 & 0 & 0 & 0 \\ 0 & 2 & .6 & .6 & .6 \\ 0 & .6 & 2 & .6 & .6 \\ 0 & .6 & .6 & 2 & .6 \\ 0 & .6 & .6 & .6 & 2 \end{bmatrix}$$

484 which was chosen to reflect the following prior information: (1) the relative scale of  
485  $\text{Gamma}_{11}$  to  $\text{Gamma}_{kk}$  (for  $k \in \{2, \dots, 5\}$ ) implies that we have little knowledge regarding  
486 the mean composition between individuals but that we conservatively expect that the  
487 association between butyrate production and microbial composition is small  
488 comparatively. (2) the value of 0.6 state that, on average across genera, we assume that

489 the effects each prebiotic are correlated with an average correlation of 0.3, (3) in concert  
490 with our prior choices for  $X_i$  and  $upsilon$  (below), the scale of  $Gamma$  represents our  
491 assumption that the technical noise in our community measurements is smaller (by a  
492 factor of  $\approx e^2$ ) than the magnitude of the biological variation between samples. This later  
493 prior regarding technical versus biological variation was informed by Silverman, Durand  
494 (79). All prior choices were further investigated using prior predictive checks (84). To  
495 reflect a weak prior assumption that the absolute abundance of each taxon is uncorrelated  
496 we choose  $upsilon = D + 3$  and  $X_i$  to be the  $(D - 1) \times (D - 1)$  matrix with elements  $X_{ii} =$   
497  $(upsilon - D)$  and  $X_{ij} = (upsilon - D)/2$ , for  $j \neq i$  (85). While the model fit by  $stray$  and  
498 our corresponding priors were specified with respect to additive log-ratio coordinates, we  
499 utilized theory from compositional data analysis to transform these results into centered  
500 log-ratio coordinates for interpretation (79). Credible intervals and figures reflect 2000  
501 samples from the posterior distribution of the corresponding multivariate regression  
502 model.

503

## 504 **Acknowledgements**

505 This work was supported in part by NIH grants R24-DK110492 and  
506 1R01DK116187, the Translational Research Institute through Cooperative Agreement  
507 NNX16AO69A, the Damon Runyon Cancer Research Foundation, and the UNC CGIBD  
508 (NIDDK P30DK034987). This work used a high-performance computing facility partially  
509 supported by grant 2016-IDG-1013 ("HARDAC+: Reproducible HPC for Next-generation  
510 Genomics") from the North Carolina Biotechnology Center. The authors would also like

511 to acknowledge Jessica McCann, Cameron Catherine, Charles Sarria, Alexandra Zizzi,  
512 and Janet Wooton for their contributions to this work.

513

514 **Conflicts of Interest**

515 L.A.D. was a member of the Kaleido Biosciences Strategic Advisory Board and

516 retains equity in the company.

## 517 References

- 518 1. Skinner AC, Skelton JA. 2014. Prevalence and trends in obesity and severe  
519 obesity among children in the United States, 1999-2012. *JAMA Pediatr* 168:561-  
520 6.
- 521 2. Freedman DS, Fulton JE, Dietz WH, Pan L, Nihiser AJ, Srinivasan SR, Berenson  
522 GS. 2010. The identification of children with adverse risk factor levels by body  
523 mass index cutoffs from 2 classification systems: the Bogalusa Heart Study. *Am*  
524 *J Clin Nutr* 92:1298-305.
- 525 3. Freedman DS, Goodman A, Contreras OA, DasMahapatra P, Srinivasan SR,  
526 Berenson GS. 2012. Secular trends in BMI and blood pressure among children  
527 and adolescents: the Bogalusa Heart Study. *Pediatrics* 130:e159-66.
- 528 4. Finkelstein EA, Graham WC, Malhotra R. 2014. Lifetime direct medical costs of  
529 childhood obesity. *Pediatrics* 133:854-62.
- 530 5. Whitlock EP, O'Connor EA, Williams SB, Beil TL, Lutz KW. 2010. Effectiveness  
531 of weight management interventions in children: a targeted systematic review for  
532 the USPSTF. *Pediatrics* 125:e396-418.
- 533 6. Greenblum S, Turnbaugh PJ, Borenstein E. 2012. Metagenomic systems biology  
534 of the human gut microbiome reveals topological shifts associated with obesity  
535 and inflammatory bowel disease. *Proc Natl Acad Sci U S A* 109:594-9.
- 536 7. Jumpertz R, Le DS, Turnbaugh PJ, Trinidad C, Bogardus C, Gordon JI, Krakoff  
537 J. 2011. Energy-balance studies reveal associations between gut microbes,  
538 caloric load, and nutrient absorption in humans. *Am J Clin Nutr* 94:58-65.
- 539 8. Ley RE, Turnbaugh PJ, Klein S, Gordon JI. 2006. Microbial ecology: human gut  
540 microbes associated with obesity. *Nature* 444:1022-3.
- 541 9. Turnbaugh PJ, Backhed F, Fulton L, Gordon JI. 2008. Diet-induced obesity is  
542 linked to marked but reversible alterations in the mouse distal gut microbiome.  
543 *Cell Host Microbe* 3:213-23.
- 544 10. Turnbaugh PJ, Ley RE, Mahowald MA, Magrini V, Mardis ER, Gordon JI. 2006.  
545 An obesity-associated gut microbiome with increased capacity for energy  
546 harvest. *Nature* 444:1027.
- 547 11. Thangaraju M, Cresci GA, Liu K, Ananth S, Gnanaprakasam JP, Browning DD,  
548 Mellinger JD, Smith SB, Digby GJ, Lambert NA, Prasad PD, Ganapathy V. 2009.  
549 GPR109A is a G-protein-coupled receptor for the bacterial fermentation product  
550 butyrate and functions as a tumor suppressor in colon. *Cancer Res* 69:2826-32.
- 551 12. Samuel BS, Shaito A, Motoike T, Rey FE, Backhed F, Manchester JK, Hammer  
552 RE, Williams SC, Crowley J, Yanagisawa M, Gordon JI. 2008. Effects of the gut  
553 microbiota on host adiposity are modulated by the short-chain fatty-acid binding  
554 G protein-coupled receptor, Gpr41. *Proc Natl Acad Sci U S A* 105:16767-72.
- 555 13. Brown AJ, Goldsworthy SM, Barnes AA, Eilert MM, Tcheang L, Daniels D, Muir  
556 AI, Wigglesworth MJ, Kinghorn I, Fraser NJ, Pike NB, Strum JC, Steplewski KM,  
557 Murdock PR, Holder JC, Marshall FH, Szekeres PG, Wilson S, Ignar DM, Foord  
558 SM, Wise A, Dowell SJ. 2003. The Orphan G protein-coupled receptors GPR41

- 559 and GPR43 are activated by propionate and other short chain carboxylic acids. *J*  
560 *Biol Chem* 278:11312-9.
- 561 14. Thomas C, Pellicciari R, Pruzanski M, Auwerx J, Schoonjans K. 2008. Targeting  
562 bile-acid signalling for metabolic diseases. *Nature Reviews Drug Discovery*  
563 7:678.
- 564 15. Sonnenburg JL, Bäckhed F. 2016. Diet–microbiota interactions as moderators of  
565 human metabolism. *Nature* 535:56.
- 566 16. Roediger WE. 1982. Utilization of nutrients by isolated epithelial cells of the rat  
567 colon. *Gastroenterology* 83:424-9.
- 568 17. Davie JR. 2003. Inhibition of histone deacetylase activity by butyrate. *J Nutr*  
569 133:2485S-2493S.
- 570 18. Candido EP, Reeves R, Davie JR. 1978. Sodium butyrate inhibits histone  
571 deacetylation in cultured cells. *Cell* 14:105-13.
- 572 19. Smith PM, Howitt MR, Panikov N, Michaud M, Gallini CA, Bohlooly YM, Glickman  
573 JN, Garrett WS. 2013. The microbial metabolites, short-chain fatty acids, regulate  
574 colonic Treg cell homeostasis. *Science* 341:569-73.
- 575 20. Lee C, Kim BG, Kim JH, Chun J, Im JP, Kim JS. 2017. Sodium butyrate inhibits  
576 the NF-kappa B signaling pathway and histone deacetylation, and attenuates  
577 experimental colitis in an IL-10 independent manner. *Int Immunopharmacol*  
578 51:47-56.
- 579 21. Yan H, Ajuwon KM. 2017. Butyrate modifies intestinal barrier function in IPEC-J2  
580 cells through a selective upregulation of tight junction proteins and activation of  
581 the Akt signaling pathway. *PLoS One* 12:e0179586.
- 582 22. Hatayama H, Iwashita J, Kuwajima A, Abe T. 2007. The short chain fatty acid,  
583 butyrate, stimulates MUC2 mucin production in the human colon cancer cell line,  
584 LS174T. *Biochem Biophys Res Commun* 356:599-603.
- 585 23. Tolhurst G, Heffron H, Lam YS, Parker HE, Habib AM, Diakogiannaki E,  
586 Cameron J, Grosse J, Reimann F, Gribble FM. 2012. Short-chain fatty acids  
587 stimulate glucagon-like peptide-1 secretion via the G-protein-coupled receptor  
588 FFAR2. *Diabetes* 61:364-71.
- 589 24. Vinolo MAR, Rodrigues HG, Festuccia WT, Crisma AR, Alves VS, Martins AR,  
590 Amaral CL, Fiamoncini J, Hirabara SM, Sato FT, Fock RA, Malheiros G, dos  
591 Santos MF, Curi R. 2012. Tributyrin attenuates obesity-associated inflammation  
592 and insulin resistance in high-fat-fed mice. *American Journal of Physiology-*  
593 *Endocrinology and Metabolism* 303:E272-E282.
- 594 25. Gao Z, Yin J, Zhang J, Ward RE, Martin RJ, Lefevre M, Cefalu WT, Ye J. 2009.  
595 Butyrate improves insulin sensitivity and increases energy expenditure in mice.  
596 *Diabetes* 58:1509-1517.
- 597 26. Henagan TM, Stefanska B, Fang Z, Navard AM, Ye J, Lenard NR, Devarshi PP.  
598 2015. Sodium butyrate epigenetically modulates high-fat diet-induced skeletal  
599 muscle mitochondrial adaptation, obesity and insulin resistance through  
600 nucleosome positioning. *British journal of pharmacology* 172:2782-2798.



- 601 27. Lu Y, Fan C, Li P, Lu Y, Chang X, Qi K. 2016. Short Chain Fatty Acids Prevent  
602 High-fat-diet-induced Obesity in Mice by Regulating G Protein-coupled Receptors  
603 and Gut Microbiota. *Sci Rep* 6:37589.
- 604 28. Frost G, Sleeth ML, Sahuri-Arisoylu M, Lizarbe B, Cerdan S, Brody L,  
605 Anastasovska J, Ghourab S, Hankir M, Zhang S, Carling D, Swann JR, Gibson  
606 G, Viardot A, Morrison D, Louise Thomas E, Bell JD. 2014. The short-chain fatty  
607 acid acetate reduces appetite via a central homeostatic mechanism. *Nat*  
608 *Commun* 5:3611.
- 609 29. Lin HV, Frassetto A, Kowalik EJ, Jr., Nawrocki AR, Lu MM, Kosinski JR, Hubert  
610 JA, Szeto D, Yao X, Forrest G, Marsh DJ. 2012. Butyrate and propionate protect  
611 against diet-induced obesity and regulate gut hormones via free fatty acid  
612 receptor 3-independent mechanisms. *PLoS One* 7:e35240.
- 613 30. McOrist AL, Miller RB, Bird AR, Keogh JB, Noakes M, Topping DL, Conlon MA.  
614 2011. Fecal butyrate levels vary widely among individuals but are usually  
615 increased by a diet high in resistant starch. *J Nutr* 141:883-9.
- 616 31. Venkataraman A, Sieber JR, Schmidt AW, Waldron C, Theis KR, Schmidt TM.  
617 2016. Variable responses of human microbiomes to dietary supplementation with  
618 resistant starch. *Microbiome* 4:9.
- 619 32. Abrams SA, Griffin IJ, Hawthorne KM, Ellis KJ. 2007. Effect of prebiotic  
620 supplementation and calcium intake on body mass index. *J Pediatr* 151:293-8.
- 621 33. Nicolucci AC, Hume MP, Martínez I, Mayengbam S, Walter J, Reimer RA. 2017.  
622 Prebiotics Reduce Body Fat and Alter Intestinal Microbiota in Children Who Are  
623 Overweight or With Obesity. *Gastroenterology* 153:711-722.
- 624 34. Liber A, Szajewska H. 2014. Effect of oligofructose supplementation on body  
625 weight in overweight and obese children: a randomised, double-blind, placebo-  
626 controlled trial. *Br J Nutr* 112:2068-74.
- 627 35. Baxter NT, Schmidt AW, Venkataraman A, Kim KS, Waldron C, Schmidt TM.  
628 2019. Dynamics of Human Gut Microbiota and Short-Chain Fatty Acids in  
629 Response to Dietary Interventions with Three Fermentable Fibers. *Mbio* 10.
- 630 36. Murugesan S, Ulloa-Martínez M, Martínez-Rojano H, Galván-Rodríguez FM,  
631 Miranda-Brito C, Romano MC, Piña-Escobedo A, Pizano-Zárte ML, Hoyo-  
632 Vadillo C, García-Mena J. 2015. Study of the diversity and short-chain fatty acids  
633 production by the bacterial community in overweight and obese Mexican  
634 children. *European Journal of Clinical Microbiology & Infectious Diseases*  
635 34:1337-1346.
- 636 37. Nicolucci AC, Reimer RA. 2017. Prebiotics as a modulator of gut microbiota in  
637 paediatric obesity. *Pediatr Obes* 12:265-273.
- 638 38. Faith JJ, Guruge JL, Charbonneau M, Subramanian S, Seedorf H, Goodman AL,  
639 Clemente JC, Knight R, Heath AC, Leibel RL, Rosenbaum M, Gordon JI. 2013.  
640 The Long-Term Stability of the Human Gut Microbiota. *Science* 341:1237439.
- 641 39. Ruppin H, Bar-Meir S, Soergel KH, Wood CM, Schmitt MG, Jr. 1980. Absorption  
642 of Short-Chain Fatty Acids by the Colon. *Gastroenterology* 78:1500-1507.
- 643 40. Rechkemmer G, Rönna K, Engelhardt WV. 1988. Fermentation of  
644 polysaccharides and absorption of short chain fatty acids in the mammalian

- 645 hindgut. *Comparative Biochemistry and Physiology Part A: Physiology* 90:563-  
646 568.
- 647 41. Edwards CA, Gibson G, Champ M, Jensen BB, Mathers JC, Nagengast F,  
648 Rumney C, Quehl A. 1996. In Vitro Method for Quantification of the Fermentation  
649 of Starch by Human Faecal Bacteria. *Journal of the Science of Food and*  
650 *Agriculture* 71:209-217.
- 651 42. Coles LT, Moughan PJ, Awati A, Darragh AJ. 2013. Optimisation of inoculum  
652 concentration and incubation duration for an in vitro hindgut dry matter  
653 digestibility assay. *Food Chem* 136:624-31.
- 654 43. Rotbart A, Yao CK, Ha N, Chrisp MD, Muir JG, Gibson PR, Kalantar-zadeh K, Ou  
655 JZ. 2017. Designing an in-vitro gas profiling system for human faecal samples.  
656 *Sensors and Actuators B-Chemical* 238:754-764.
- 657 44. Coles LT, Moughan PJ, Awati A, Darragh AJ. 2011. Influence of assay conditions  
658 on the in vitro hindgut digestibility of dry matter. *Food Chemistry* 125:1351-1358.
- 659 45. Proano M, Camilleri M, Phillips SF, Brown ML, Thomforde GM. 1990. Transit of  
660 Solids through the Human Colon - Regional Quantification in the Unprepared  
661 Bowel. *American Journal of Physiology* 258:G856-G862.
- 662 46. Gamage HKAH, Tetu SG, Chong RWW, Ashton J, Packer NH, Paulsen IT. 2017.  
663 Cereal products derived from wheat, sorghum, rice and oats alter the infant gut  
664 microbiota in vitro. *Scientific Reports* 7.
- 665 47. Silverman JD, Roche K, Holmes ZC, David LA, Mukherjee S. 2019. Bayesian  
666 Multinomial Logistic Normal Models through Marginally Latent Matrix-T  
667 Processes. eprint arXiv:1903.11695:arXiv:1903.11695.
- 668 48. Flint HJ, Scott KP, Duncan SH, Louis P, Forano E. 2012. Microbial degradation  
669 of complex carbohydrates in the gut. *Gut Microbes* 3:289-306.
- 670 49. Holscher HD. 2017. Dietary fiber and prebiotics and the gastrointestinal  
671 microbiota. *Gut Microbes* 8:172-184.
- 672 50. Gamage H, Tetu SG, Chong RWW, Bucio-Noble D, Rosewarne CP, Kautto L,  
673 Ball MS, Molloy MP, Packer NH, Paulsen IT. 2018. Fiber Supplements Derived  
674 From Sugarcane Stem, Wheat Dextrin and Psyllium Husk Have Different In Vitro  
675 Effects on the Human Gut Microbiota. *Front Microbiol* 9:1618.
- 676 51. Biddle A, Stewart L, Blanchard J, Leschine S. 2013. Untangling the Genetic  
677 Basis of Fibrolytic Specialization by Lachnospiraceae and Ruminococcaceae in  
678 Diverse Gut Communities. *Diversity* 5.
- 679 52. Holdeman LV, Moore WEC. 1974. New Genus, *Coprococcus*, 12 New Species,  
680 and Emended Descriptions of 4 Previously Described Species of Bacteria from  
681 Human Feces. *International Journal of Systematic Bacteriology* 24:260-277.
- 682 53. Belzer C, Chia LW, Aalvink S, Chamlagain B, Piironen V, Knol J, de Vos WM.  
683 2017. Microbial Metabolic Networks at the Mucus Layer Lead to Diet-  
684 Independent Butyrate and Vitamin B<sub>12</sub> Production by Intestinal  
685 Symbionts. *mBio* 8.
- 686 54. Samuel BS, Gordon JI. 2006. A humanized gnotobiotic mouse model of host-  
687 archaeal-bacterial mutualism. *Proc Natl Acad Sci U S A* 103:10011-6.

- 688 55. Mathewson ND, Jenq R, Mathew AV, Koenigs knecht M, Hanash A, Toubai T,  
689 Oravec z-Wilson K, Wu S-R, Sun Y, Rossi C, Fujiwara H, Byun J, Shono Y,  
690 Lindemans C, Calafiore M, Schmidt TM, Honda K, Young VB, Pennathur S, van  
691 den Brink M, Reddy P. 2016. Gut microbiome-derived metabolites modulate  
692 intestinal epithelial cell damage and mitigate graft-versus-host disease. *Nature*  
693 *Immunology* 17:505.
- 694 56. Senga T, Iwamoto S, Yoshida T, Yokota T, Adachi K, Azuma E, Hamaguchi M,  
695 Iwamoto T. 2003. LSSIG is a novel murine leukocyte-specific GPCR that is  
696 induced by the activation of STAT3. *Blood* 101:1185-1187.
- 697 57. Ang Z, Ding JL. 2016. GPR41 and GPR43 in Obesity and Inflammation -  
698 Protective or Causative? *Front Immunol* 7:28.
- 699 58. Poeker SA, Geirnaert A, Berchtold L, Greppi A, Krych L, Steinert RE, de Wouters  
700 T, Lacroix C. 2018. Understanding the prebiotic potential of different dietary  
701 fibers using an in vitro continuous adult fermentation model (PolyFermS).  
702 *Scientific Reports* 8.
- 703 59. Hume MP, Nicolucci AC, Reimer RA. 2017. Prebiotic supplementation improves  
704 appetite control in children with overweight and obesity: a randomized controlled  
705 trial. *Am J Clin Nutr* 105:790-799.
- 706 60. Zeevi D, Korem T, Zmora N, Israeli D, Rothschild D, Weinberger A, Ben-Yacov  
707 O, Lador D, Avnit-Sagi T, Lotan-Pompan M, Suez J, Mahdi JA, Matot E, Malka  
708 G, Kosower N, Rein M, Zilberman-Schapira G, Dohnalova L, Pevsner-Fischer M,  
709 Bikovsky R, Halpern Z, Elinav E, Segal E. 2015. Personalized Nutrition by  
710 Prediction of Glycemic Responses. *Cell* 163:1079-1094.
- 711 61. Kimura I, Ozawa K, Inoue D, Imamura T, Kimura K, Maeda T, Terasawa K,  
712 Kashihara D, Hirano K, Tani T, Takahashi T, Miyauchi S, Shioi G, Inoue H,  
713 Tsujimoto G. 2013. The gut microbiota suppresses insulin-mediated fat  
714 accumulation via the short-chain fatty acid receptor GPR43. *Nat Commun*  
715 4:1829.
- 716 62. Zhan K, Jiang M, Gong X, Zhao G. 2018. Effect of short-chain fatty acids on the  
717 expression of genes involved in short-chain fatty acid transporters and  
718 inflammatory response in goat jejunum epithelial cells. *In Vitro Cellular &*  
719 *Developmental Biology - Animal* 54:311-320.
- 720 63. den Besten G, van Eunen K, Groen AK, Venema K, Reijngoud DJ, Bakker BM.  
721 2013. The role of short-chain fatty acids in the interplay between diet, gut  
722 microbiota, and host energy metabolism. *J Lipid Res* 54:2325-40.
- 723 64. Louis P, Flint HJ. 2009. Diversity, metabolism and microbial ecology of butyrate-  
724 producing bacteria from the human large intestine. *FEMS Microbiol Lett* 294:1-8.
- 725 65. Pryde SE, Duncan SH, Hold GL, Stewart CS, Flint HJ. 2002. The microbiology of  
726 butyrate formation in the human colon. *FEMS Microbiol Lett* 217:133-9.
- 727 66. Chu ND, Smith MB, Perrotta AR, Kassam Z, Alm EJ. 2017. Profiling Living  
728 Bacteria Informs Preparation of Fecal Microbiota Transplantations. *PloS one*  
729 12:e0170922-e0170922.

- 730 67. Song SJ, Amir A, Metcalf JL, Amato KR, Xu ZZ, Humphrey G, Knight R. 2016.  
731 Preservation Methods Differ in Fecal Microbiome Stability, Affecting Suitability for  
732 Field Studies. *mSystems* 1:e00021-16.
- 733 68. Vandeputte D, Falony G, Vieira-Silva S, Tito RY, Joossens M, Raes J. 2016.  
734 Stool consistency is strongly associated with gut microbiota richness and  
735 composition, enterotypes and bacterial growth rates. *Gut* 65:57.
- 736 69. Stephen AM, Cummings JH. 1980. Mechanism of action of dietary fibre in the  
737 human colon. *Nature* 284:283-284.
- 738 70. O'Donnell MM, Rea MC, O'Sullivan Ó, Flynn C, Jones B, McQuaid A, Shanahan  
739 F, Ross RP. 2016. Preparation of a standardised faecal slurry for ex-vivo  
740 microbiota studies which reduces inter-individual donor bias. *Journal of*  
741 *Microbiological Methods* 129:109-116.
- 742 71. Barry JL, Hoebler C, Macfarlane GT, Macfarlane S, Mathers JC, Reed KA,  
743 Mortensen PB, Nordgaard I, Rowland IR, Rumney CJ. 1995. Estimation of the  
744 fermentability of dietary fibre in vitro: a European interlaboratory study. *Br J Nutr*  
745 74:303-22.
- 746 72. Contijoch EJ, Britton GJ, Yang C, Mogno I, Li ZH, Ng R, Llewellyn SR, Hira S,  
747 Johnson C, Rabinowitz KM, Barkan R, Dotan I, Hirten RP, Fu SC, Luo YY, Yang  
748 N, Luong T, Labrias PR, Lira S, Peter I, Grinspan A, Clemente JC, Kosoy R, Kim-  
749 Schulze S, Qin XC, Castillo A, Hurley A, Atreja A, Rogers J, Fasihuddin F, Saliyaj  
750 M, Nolan A, Reyes-Mercedes P, Rodriguez C, Aly S, Santa-Cruz K, Peters L,  
751 Suarez-Farinas M, Huang R, Hao K, Zhu J, Zhang B, Losic B, Irizar H, Song  
752 WM, Di Narzo A, Wang WH, Cohen BL, DiMaio C, Greenwald D, et al. 2019. Gut  
753 microbiota density influences host physiology and is shaped by host and  
754 microbial factors. *Elife* 8.
- 755 73. Davies GJ, Crowder M, Reid B, Dickerson JW. 1986. Bowel function  
756 measurements of individuals with different eating patterns. *Gut* 27:164-9.
- 757 74. Zhao G, Nyman M, Jonsson JA. 2006. Rapid determination of short-chain fatty  
758 acids in colonic contents and faeces of humans and rats by acidified water-  
759 extraction and direct-injection gas chromatography. *Biomed Chromatogr* 20:674-  
760 82.
- 761 75. Caporaso JG, Lauber CL, Walters WA, Berg-Lyons D, Lozupone CA, Turnbaugh  
762 PJ, Fierer N, Knight R. 2011. Global patterns of 16S rRNA diversity at a depth of  
763 millions of sequences per sample. *Proceedings of the National Academy of*  
764 *Sciences* 108:4516.
- 765 76. Caporaso JG, Lauber CL, Walters WA, Berg-Lyons D, Huntley J, Fierer N,  
766 Owens SM, Betley J, Fraser L, Bauer M, Gormley N, Gilbert JA, Smith G, Knight  
767 R. 2012. Ultra-high-throughput microbial community analysis on the Illumina  
768 HiSeq and MiSeq platforms. *The Isme Journal* 6:1621.
- 769 77. Maurice Corinne F, Haiser Henry J, Turnbaugh Peter J. 2013. Xenobiotics Shape  
770 the Physiology and Gene Expression of the Active Human Gut Microbiome. *Cell*  
771 152:39-50.

- 772 78. Callahan BJ, McMurdie PJ, Rosen MJ, Han AW, Johnson AJ, Holmes SP. 2016.  
773 DADA2: High-resolution sample inference from Illumina amplicon data. *Nat*  
774 *Methods* 13:581-3.
- 775 79. Silverman JD, Durand HK, Bloom RJ, Mukherjee S, David LA. 2018. Dynamic  
776 linear models guide design and analysis of microbiota studies within artificial  
777 human guts. *Microbiome* 6:202.
- 778 80. Caporaso JG, Kuczynski J, Stombaugh J, Bittinger K, Bushman FD, Costello EK,  
779 Fierer N, Pena AG, Goodrich JK, Gordon JI, Huttley GA, Kelley ST, Knights D,  
780 Koenig JE, Ley RE, Lozupone CA, McDonald D, Muegge BD, Pirrung M, Reeder  
781 J, Sevinsky JR, Turnbaugh PJ, Walters WA, Widmann J, Yatsunencko T,  
782 Zaneveld J, Knight R. 2010. QIIME allows analysis of high-throughput community  
783 sequencing data. *Nat Methods* 7:335-6.
- 784 81. McMurdie PJ, Holmes S. 2013. phyloseq: an R package for reproducible  
785 interactive analysis and graphics of microbiome census data. *PLoS One*  
786 8:e61217.
- 787 82. Silverman JD. 2018. stray: Multinomial Logistic-Normal Linear Regression  
788 Models. <https://github.com/jsilve24/stray>.
- 789 83. Grantham NS, Reich BJ, Borer ET, Gross K. 2017. MIMIX: a Bayesian Mixed-  
790 Effects Model for Microbiome Data from Designed Experiments. eprint  
791 arXiv:170307747:arXiv:1703.07747.
- 792 84. Gelman A, Carlin, J., Stern, H., Dunson, D., Vehtari, A., Rubin, D. 2013.  
793 Bayesian Data Analysis. Chapman and Hall/CRC:Chapter 7.
- 794 85. Aitchison J. 1982. The Statistical Analysis of Compositional Data. *Journal of the*  
795 *Royal Statistical Society Series B (Methodological)* 44:139-177.
- 796 86. Kageyama A, Benno Y. 2000. *Catenibacterium mitsuokai* gen. nov., sp. nov., a  
797 gram-positive anaerobic bacterium isolated from human faeces. *International*  
798 *Journal of Systematic and Evolutionary Microbiology* 50:1595-1599.
- 799 87. Freier TA, Beitz DC, Li L, Hartman PA. 1994. Characterization of *Eubacterium*  
800 *coprostanoligenes* sp. nov., a cholesterol-reducing anaerobe. *Int J Syst Bacteriol*  
801 44:137-42.
- 802 88. Sakamoto M, Takagaki A, Matsumoto K, Kato Y, Goto K, Benno Y. 2009.  
803 *Butyricimonas synergistica* gen. nov., sp. nov. and *Butyricimonas virosa* sp. nov.,  
804 butyric acid-producing bacteria in the family 'Porphyromonadaceae' isolated from  
805 rat faeces. *Int J Syst Evol Microbiol* 59:1748-53.
- 806 89. Candela M, Biagi E, Soverini M, Consolandi C, Quercia S, Severgnini M, Peano  
807 C, Turrone S, Rampelli S, Pozzilli P, Pianesi M, Fallucca F, Brigidi P. 2016.  
808 Modulation of gut microbiota dysbioses in type 2 diabetic patients by macrobiotic  
809 Ma-Pi 2 diet. *British Journal of Nutrition* 116:80-93.
- 810

811 **FIGURES AND TABLES**

812

| Variable | Male (n) | Female (n) | BMI Range   | Average BMI | Age Range | Average Age | Total |
|----------|----------|------------|-------------|-------------|-----------|-------------|-------|
| Value    | 6        | 10         | 25.9 – 75.3 | 34.9        | 10-18     | 15.7        | 17    |

813 **Table 1: Demographic characteristics of participants in this study. One patient**

814 provided samples used in all analyses but was lost to follow-up before providing clinical

815 metadata; that patient is only counted in the total column.



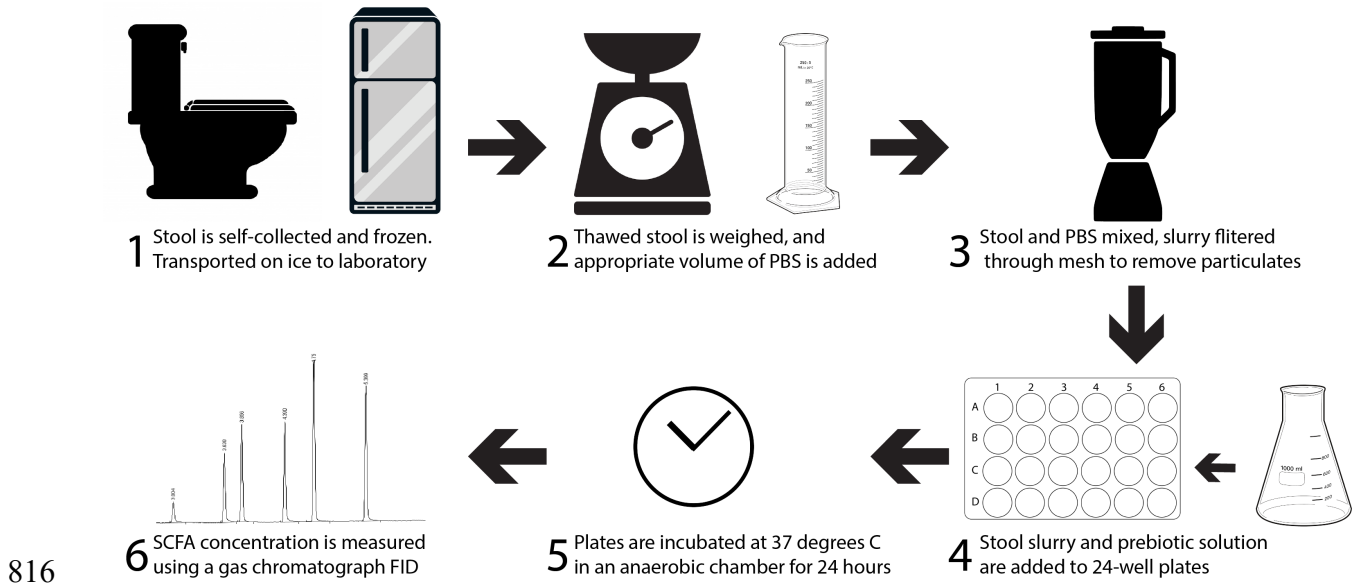

816

817

**Figure 1: Overview of *in vitro* fermentation methods.**

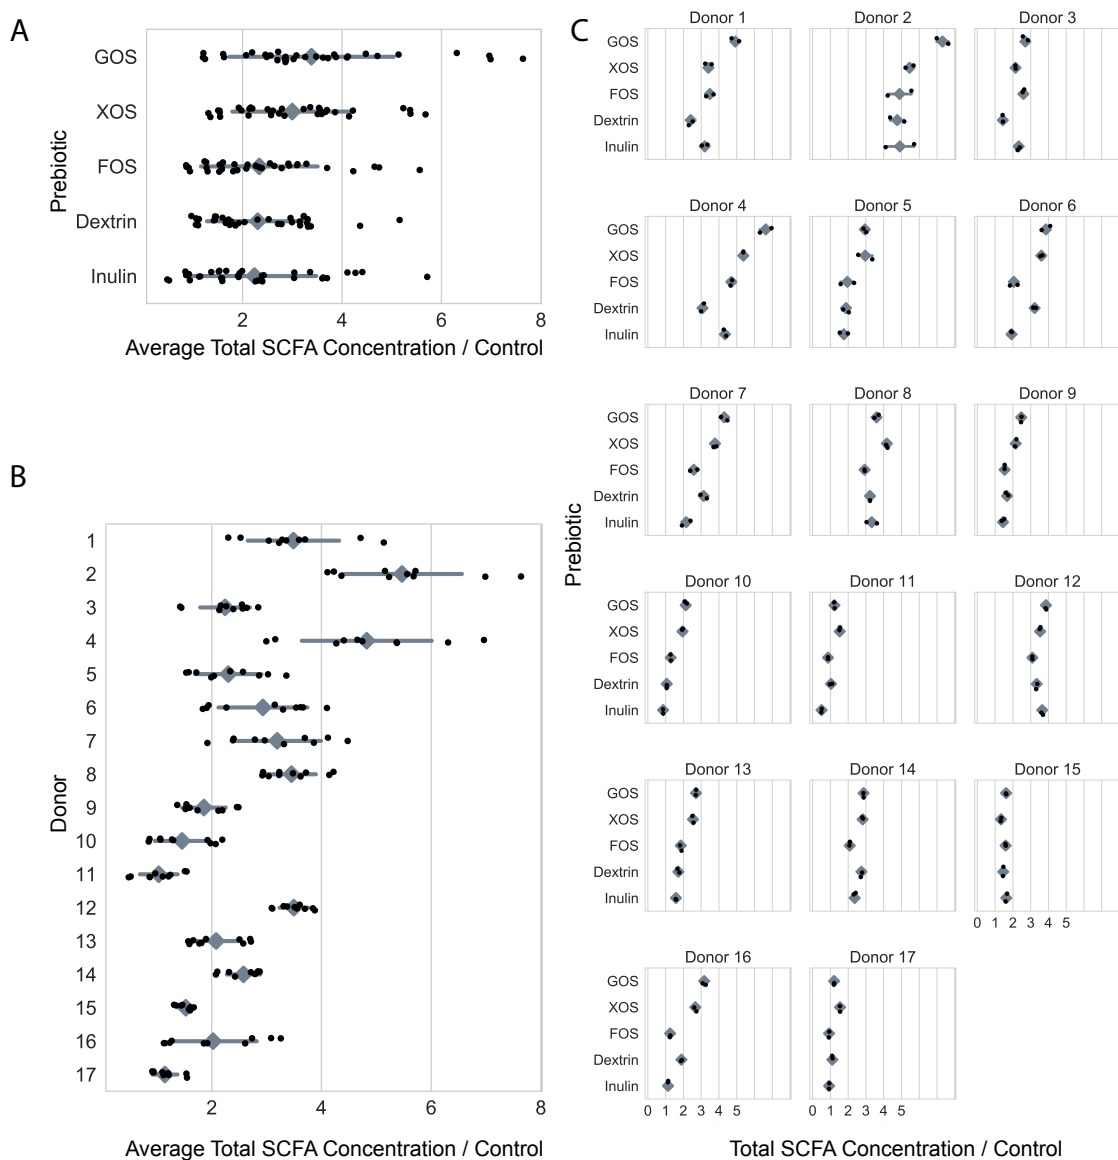

818

819 **Figure 2: In vitro SCFA production by prebiotic (a), donor (b), and individually (c).**

820 In a two-way ANOVA of the effects of 'Donor' and 'Prebiotic' on 'SCFA Concentration /

821 Control', 'Donor', 'Prebiotic', and their interaction were all statistically significant

822 ( $p < 0.0001$ ,  $p < 0.0001$ ,  $p < 0.0001$ , respectively). Shown is the total SCFA concentration of

823 an in vitro culture after 24hrs of anaerobic incubation, divided by the SCFA

824 concentration of the corresponding prebiotic-free control culture, for each of five



825 prebiotic growth conditions across 17 donors (black dots). Grey diamonds are means  
826 and grey bars are standard deviations. (Absolute SCFA concentrations are depicted in  
827 Figure S3).

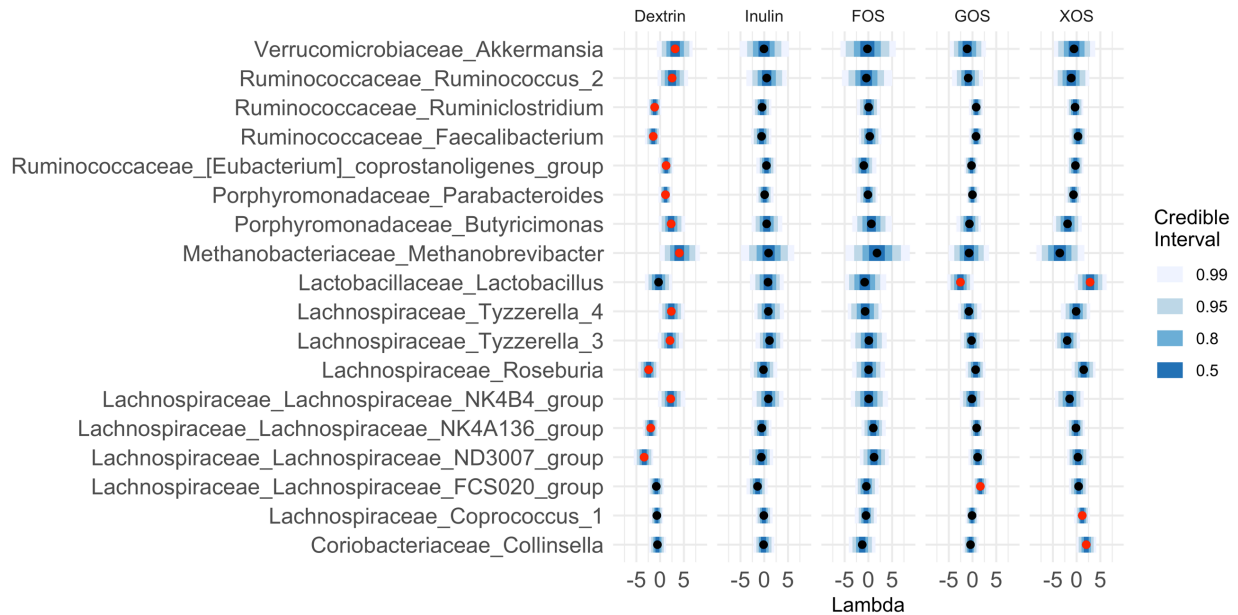

828

829 **Figure 3: 18 genera were found to be credibly associated with SCFA production in**

830 **at least one of our five prebiotic growth conditions.** Shown are the mean Lambda

831 and 99%, 95%, 80%, and 50% credible intervals for all 18 genera credibly associated

832 with at least one prebiotic growth condition, plotted on centered log-ratio (CLR)

833 coordinates. Red centers denote associations with 95% credible intervals that do not

834 cover 0. Lambda represents the strength of the effect of each covariate on each taxa. A

835 lambda of one reflects a unit fold-change in SCFA concentration over control as being

836 associated with a unit fold-change in the CLR-transformed relative abundance of the

837 genus.

|                             | BMI                         | Insulin                   | HbA1c                      |
|-----------------------------|-----------------------------|---------------------------|----------------------------|
| Average Net SCFA Production | p = 0.98<br>$\rho = -0.007$ | p = 0.63<br>$\rho = 0.13$ | p = 0.75<br>$\rho = 0.083$ |
| Fecal SCFA                  | p = 0.65<br>$\rho = -0.12$  | p = 0.61<br>$\rho = 0.13$ | p = 0.72<br>$\rho = -0.09$ |

838 **Table 2: Neither average SCFA production *in vitro* nor fecal SCFA concentration**  
839 **correlated with metrics of obesity measured in individuals at time of enrollment. P**  
840 values and  $\rho$  from Spearman correlations.

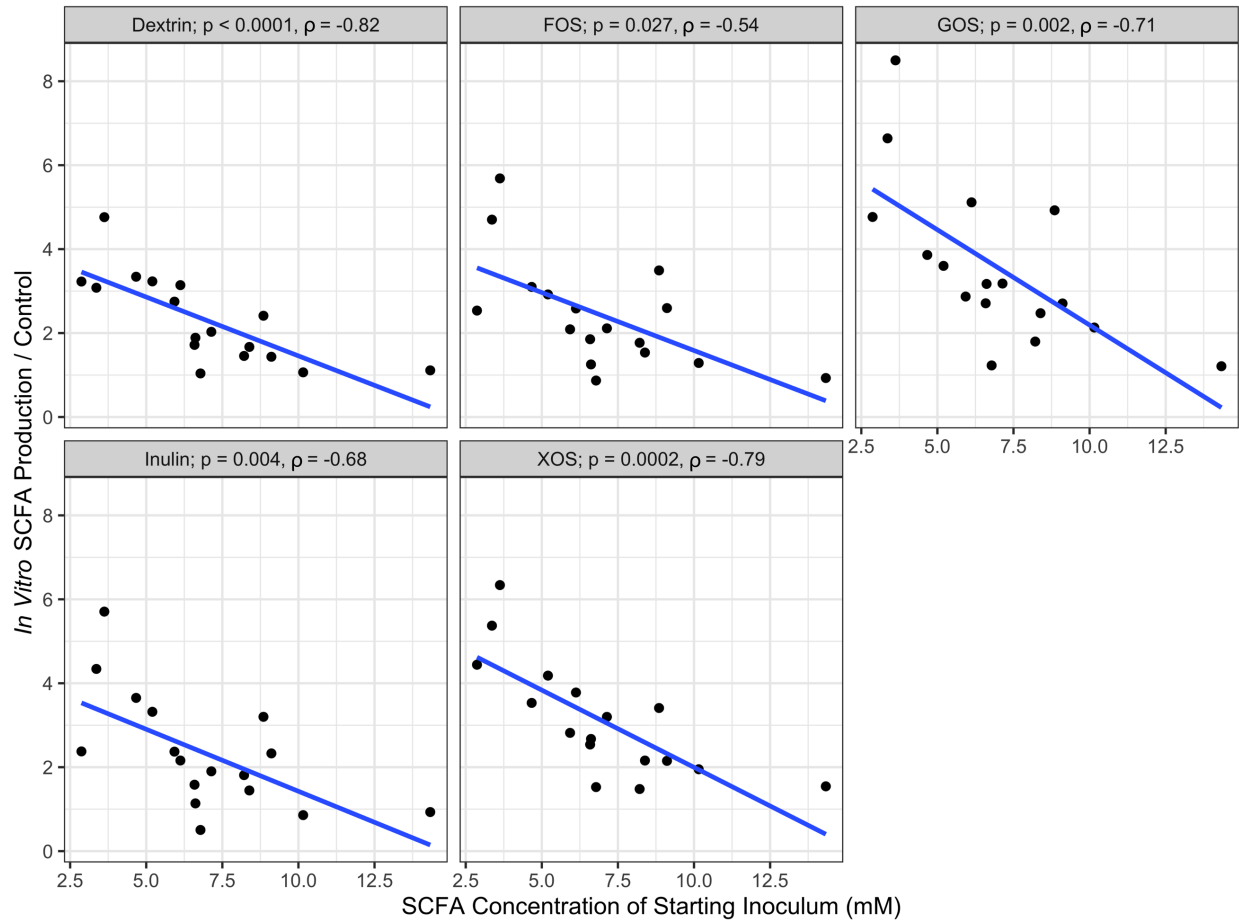

841

842 **Figure 4: Spearman correlations between *in vitro* SCFA production and SCFA**

843 **concentration of the starting fecal inoculum. SCFA production is the average of**

844 **technical replicates, with the linear regression line plotted.**

| Genus                          | Association with SCFA production |     |     |     |        | Fiber Degradation? | Reference |
|--------------------------------|----------------------------------|-----|-----|-----|--------|--------------------|-----------|
|                                | Dextrin                          | XOS | GOS | FOS | Inulin |                    |           |
| <i>Akkermansia</i>             | +                                |     |     |     |        | Supporter          | (86)      |
| <i>Ruminococcus_2</i>          | +                                |     |     |     |        | Degrader           | (48)      |
| <i>Coprostanoligenes_group</i> | +                                |     |     |     |        | No Evidence        | (87)      |
| <i>Parabacteroides</i>         | +                                |     |     |     |        | Degrader           | (49)      |
| <i>Butyricimonas</i>           | +                                |     |     |     |        | Associated         | (50)      |
| <i>Methanobrevibacter</i>      | +                                |     |     |     |        | Supporter          | (88)      |
| <i>Tyzzarella_4</i>            | +                                |     |     |     |        | Degrader           | (51)      |
| <i>Tyzzarella_3</i>            | +                                |     |     |     |        | Degrader           | (51)      |
| <i>Lachnospiraceae_NK4B4</i>   | +                                |     |     |     |        | Degrader           | (51)      |
| <i>Lactobacillus</i>           |                                  | +   | -   |     |        | Degrader           | (49)      |
| <i>Coprococcus_1</i>           |                                  | +   |     |     |        | Degrader           | (52)      |
| <i>Collinsella</i>             |                                  | +   |     |     |        | No Evidence        | (89)      |
| <i>Lachnospiraceae_FCS020</i>  |                                  |     | +   |     |        | Degrader           | (51)      |

845 **Table 3: Associations between microbial genera and SCFA production on five**  
846 **different prebiotic substrates.**

847 **SUPPLEMENTARY FIGURES AND TABLES**

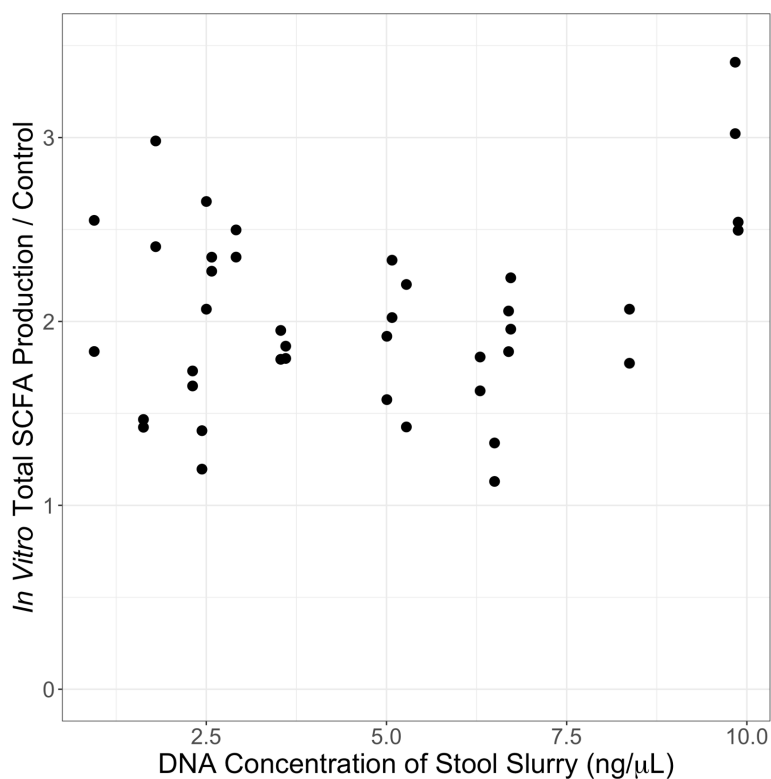

848  
849 **Figure S1: Bacteria abundance in stool, as measured by DNA concentration, does**  
850 **not correlate with control-corrected total SCFA production in *in vitro* cultures ( $p =$**   
851  **$0.38$ ,  $\rho = 0.14$ ; Spearman correlation).**

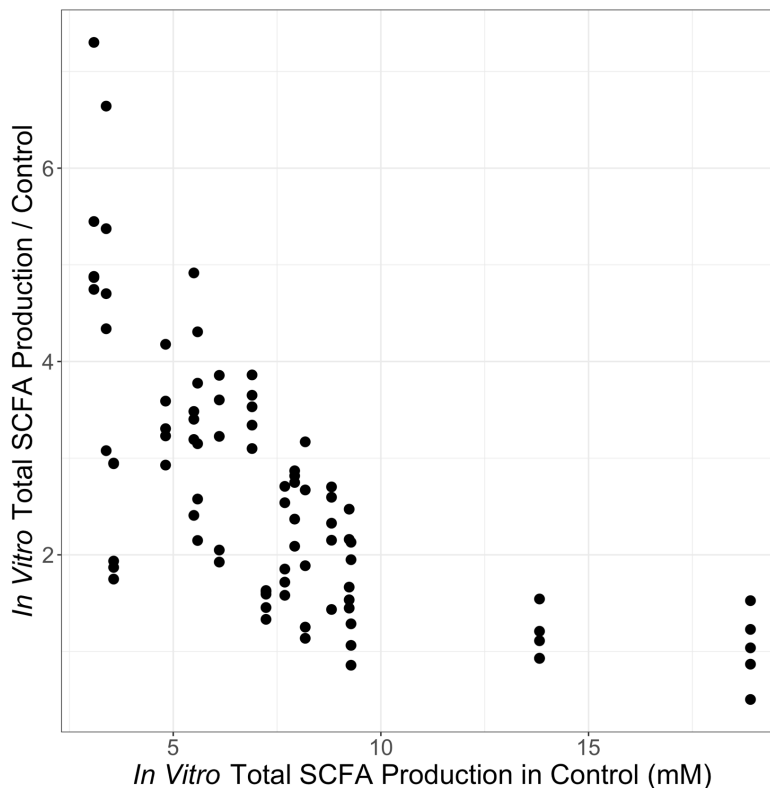

852

853 **Figure S2: To control for differences in overall cell viability or stool slurry nutrient**  
854 **content between donors, we corrected measurements of SCFA concentration by**  
855 **dividing the treatment SCFA concentration by the control SCFA concentration.**

856 The resulting fold-change data do not contain information about absolute SCFA  
857 production. We examined the potential for this artifact to influence our interpretation,  
858 and found that fold changes of SCFA concentrations after prebiotic treatment relative to  
859 the control were correlated with absolute control treatment levels ( $p < 0.0001$ ,  $\rho = -0.77$ ,  
860 Spearman correlation), Absolute (not corrected to control) SCFA concentrations are  
861 presented in figure S3.

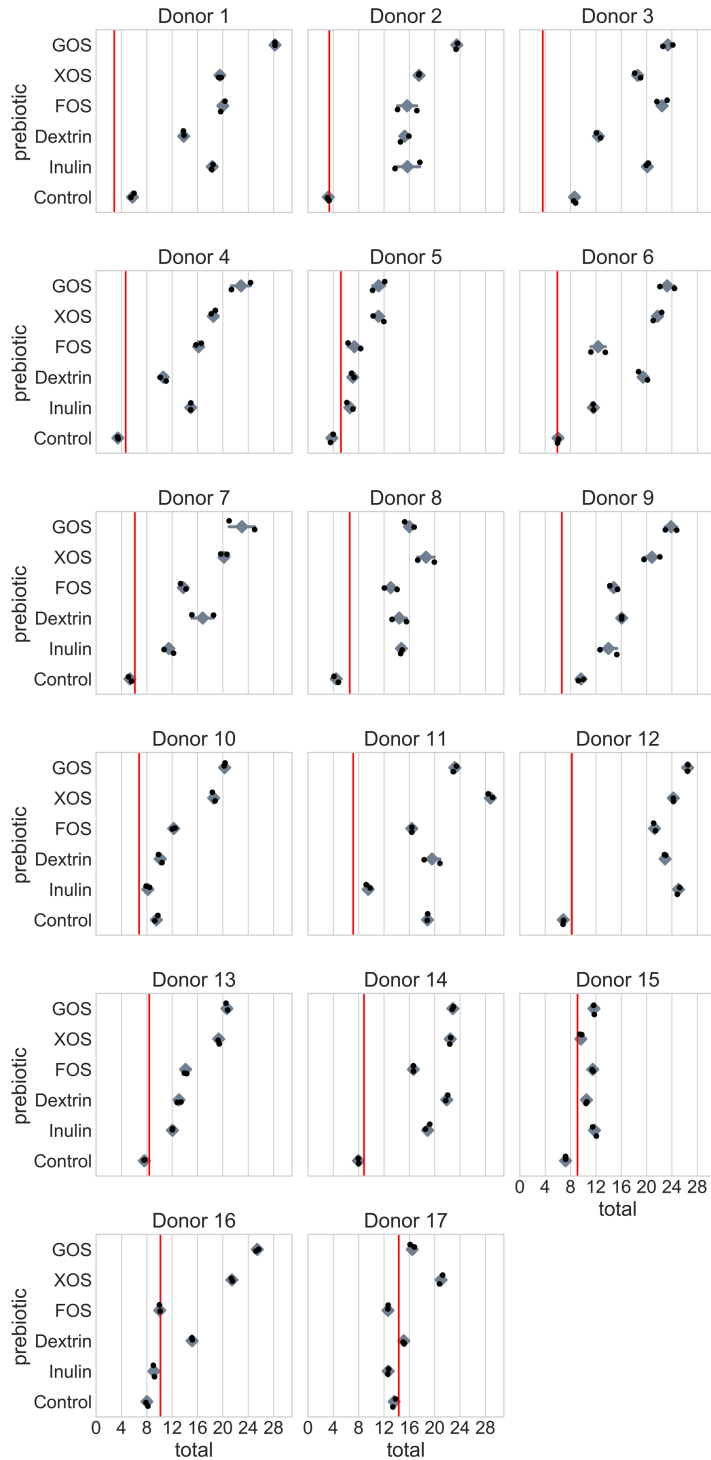

862

863

**Figure S3: Total SCFA concentration of *in vitro* fermentation vessels after 24hr**

864

**fermentation, plotted for each donor across five prebiotic treatments and the**

865

**unsupplemented control vessel. The vertical red line indicates the total SCFA**



866 concentration of the starting fecal slurry prior to fermentation. Instances where SCFA  
867 concentration decreases during fermentation may be explained by net SCFA  
868 consumption by the community when no fermentable carbon is supplied, or by a lack of  
869 change in concentration coupled with technical variation in our measurements.  
870 Instances where SCFA concentration is increased in the control treatment suggest that  
871 some unmetabolized carbohydrate may have remained in the stool to be metabolized  
872 during *in vitro* fermentation.

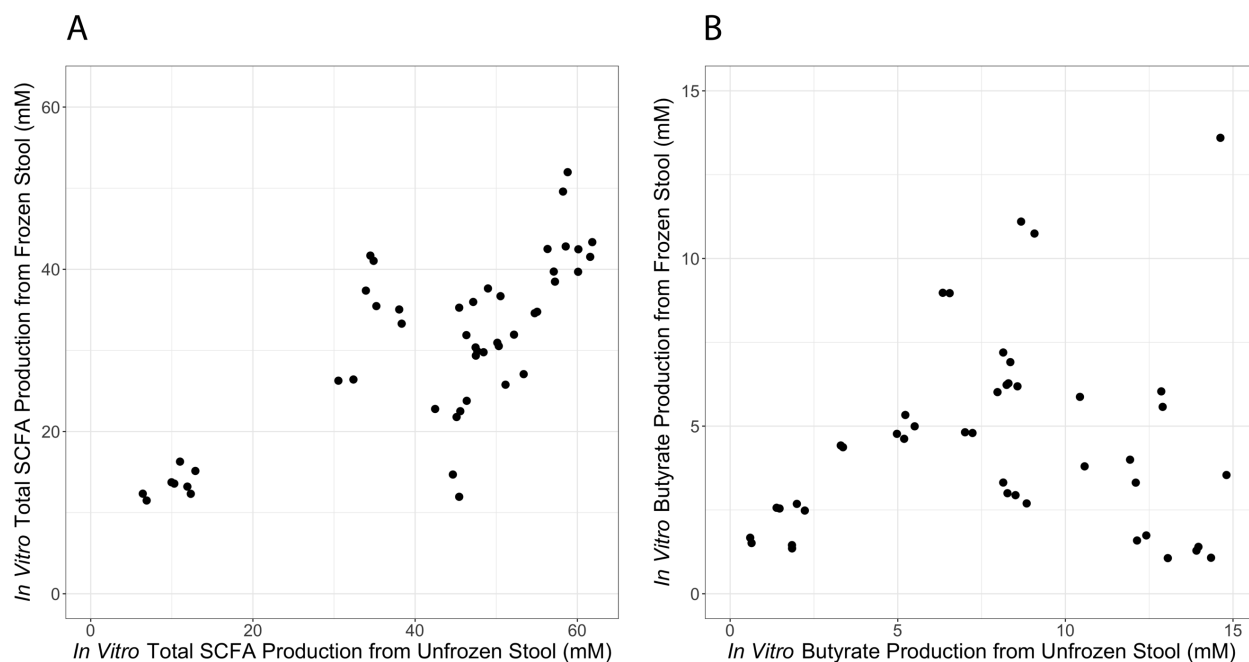

873  
874 **Figure S4: *In vitro* total SCFA production from unfrozen stool samples and from**  
875 **twice frozen stool samples is highly correlated (A,  $p < 0.0001$ ,  $\rho = 0.75$ , Spearman**  
876 **correlation). In contrast, *in vitro* butyrate production is not correlated between unfrozen**  
877 **and twice frozen stool samples (B,  $p = 0.18$ ,  $\rho = 0.19$  Spearman correlation).**

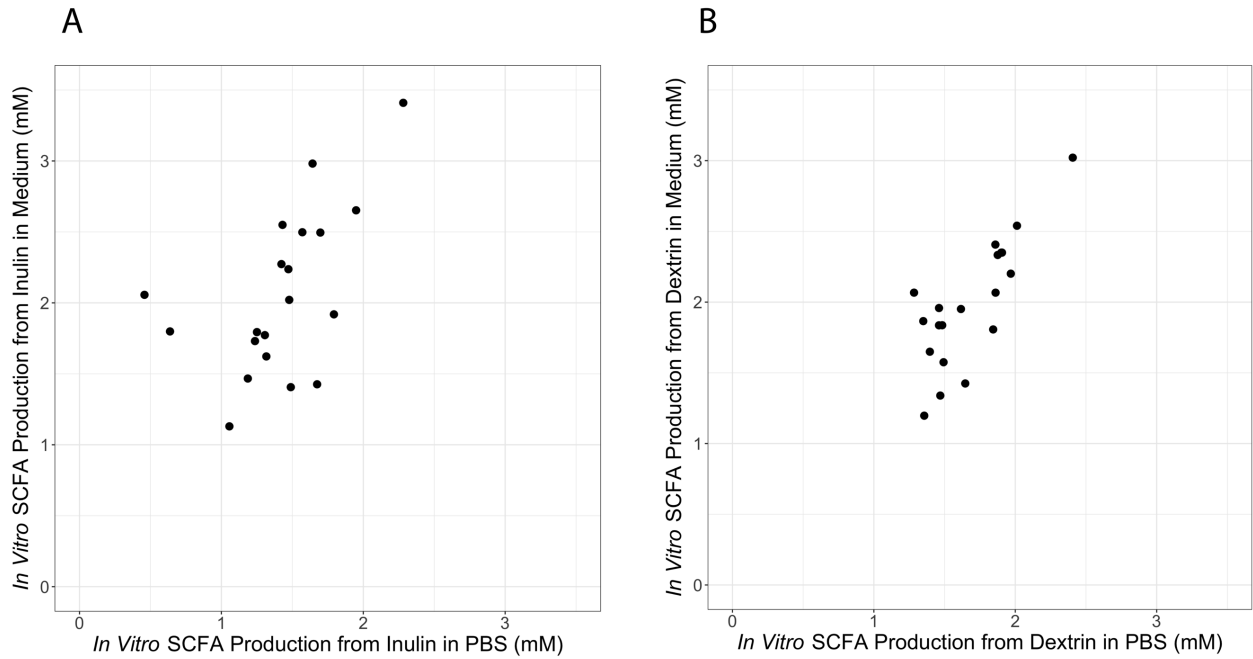

878

879

**Figure S5: *In vitro* total SCFA production from inulin (A) and dextrin (B) is well**

880

**correlated between cultures grown in PBS and cultures grown in a medium**

881

**designed to mimic the colonic environment ( $p = 0.001$ ,  $\rho = 0.68$  (A);  $p = 0.02$ ,  $\rho =$**

882

**$0.51$  (B); Spearman correlations).**

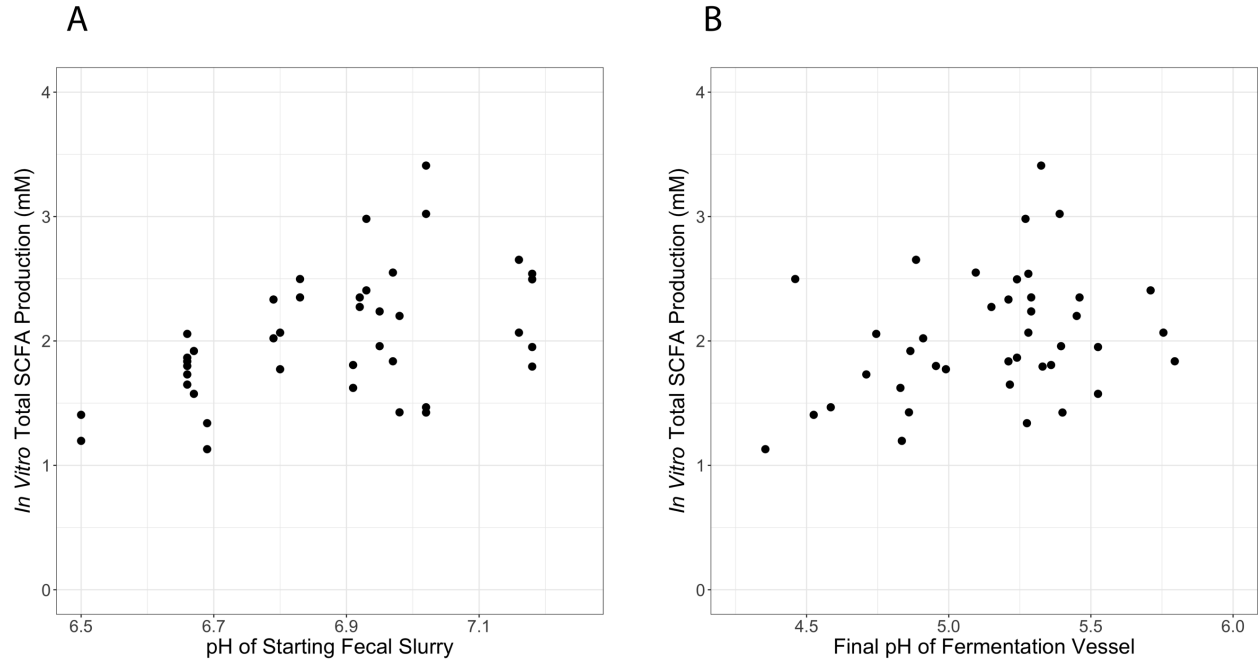

883

884 **Figure S6: *In vitro* total SCFA production over control is positively correlated with**

885 **the pH of starting fecal slurries ( $p = 0.003$ ,  $\rho = 0.46$ ; Spearman correlation). A**

886 weaker correlation might exist between SCFA production and the final pH of

887 fermentation vessels ( $p = 0.067$ ,  $\rho = 0.29$ ; Spearman correlation).

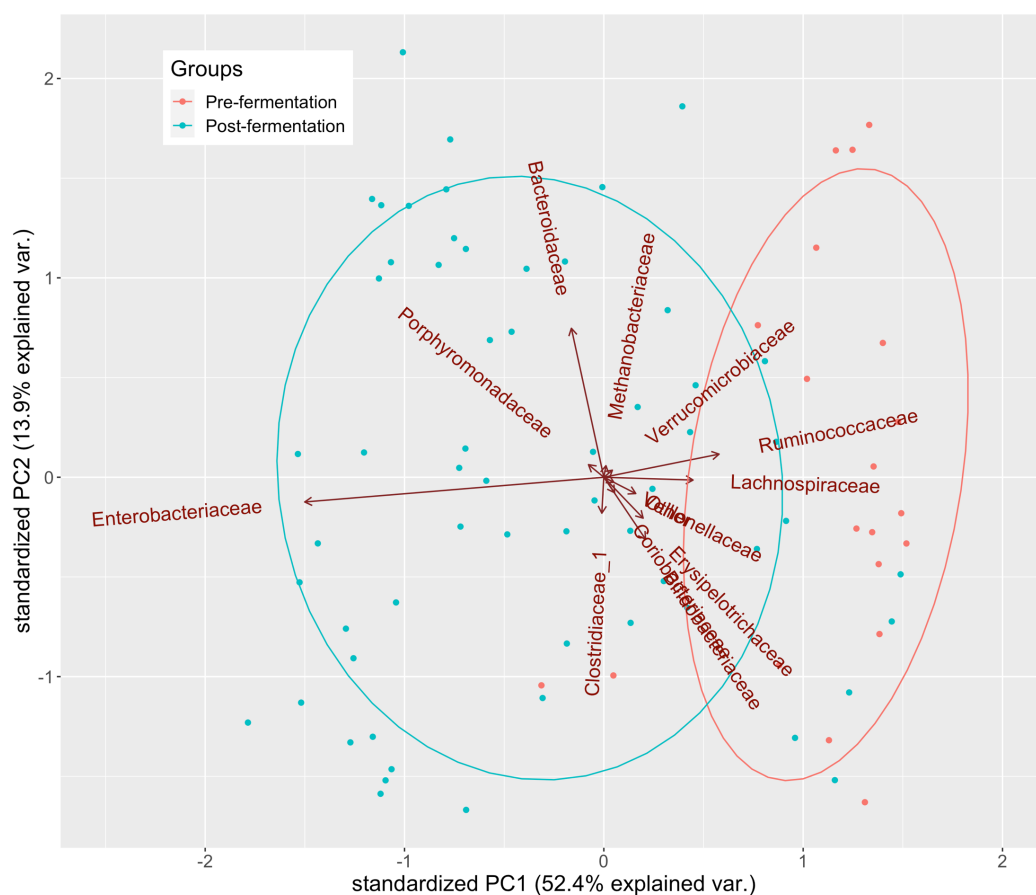

888  
889 **Figure S7: Microbial community composition changes during the course of a 24hr**  
890 **fermentation.** We performed 16S rRNA sequencing on pre-fermentation and post-  
891 fermentation samples from 20 donors across 3 treatments (inulin, dextrin, and control).  
892 We then measured the Shannon diversity of the fecal slurries both before and after  
893 fermentation (all treatments averaged) and found a significant decrease in Shannon  
894 diversity over the course of fermentation ( $p < 0.0001$ ; paired t-test). To characterize the  
895 changes in community composition associated with this decrease in diversity, we tested  
896 the pre-fermentation and post-fermentation samples for differential abundance of taxa at  
897 the species level. We found 10 taxa with significantly different abundances between the  
898 two sample sets ( $p < 0.05$ ; Benjamini-Hochberg corrected Wilcoxon rank-sum tests). Of  
899 these 10 taxa, only *Escherichia/Shigella* spp. increased in relative abundance after

900 fermentation, while nine other taxa each decreased in relative abundance (*Anaerostipes*  
901 *hadrus*, *Bacteroides acidifaciens*, *Blautia faecis*, *Blautia wexlerae* and two other *Blautia*  
902 of undetermined species, two undetermined species in the *Eubacterium hallii* group,  
903 and *Ruminococcaceae\_UCG-004 spp.*). We attribute these changes to differences in  
904 growth rates among bacteria in our in vitro system, and the inability of our fermentation  
905 medium to support the growth of some community members.

| Source          | <i>df</i> | <i>SS</i> | <i>F</i> | <i>p</i> |
|-----------------|-----------|-----------|----------|----------|
| Donor           | 16        | 243.1     | 255.4    | <0.0001  |
| Prebiotic       | 4         | 35.7      | 149.9    | <0.0001  |
| Donor*Prebiotic | 64        | 28.7      | 7.5      | <0.0001  |

906 **Table S1: Two-way ANOVA of *in vitro* SCFA production across donors and**

907 **prebiotics.**

| Patient | Treatment         | Timepoint (month) |
|---------|-------------------|-------------------|
| 1       | Lifestyle only    | 6                 |
| 2       | Lifestyle only    | 0                 |
| 3       | Lifestyle only    | 3                 |
| 4       | Lifestyle only    | 0                 |
| 5       | Lifestyle only    | 6                 |
| 6       | Lifestyle only    | 4.5               |
| 7       | Lifestyle only    | 0                 |
| 8       | Lifestyle only    | 3                 |
| 9       | Lost to follow-up | 0                 |
| 10      | Lifestyle only    | 4.5               |
| 11      | Lifestyle only    | 3                 |
| 12      | Lifestyle only    | 4.5               |
| 13      | Low carb          | 0                 |
| 14      | Lifestyle only    | 4.5               |
| 15      | Metformin         | 4.5               |
| 16      | Lifestyle only    | 4.5               |
| 17      | Lifestyle only    | 4.5               |
